# Supplementary material
Source: MDPI journal article supplement (https://www.mdpi.com/2073-4441/13/16/2166)
Supplement: s1 [file s1]

Archive with 4 entries (4 files):
- FigureS1.pdf
- FigureS2.pdf
- Table S2.xlsx
- TableS1_revised20210731.pdf
