# Supplementary material
Source: MDPI journal article supplement (https://www.mdpi.com/2073-4441/13/16/2166)
Supplement: s1 [file s1 › FigureS1.pdf]

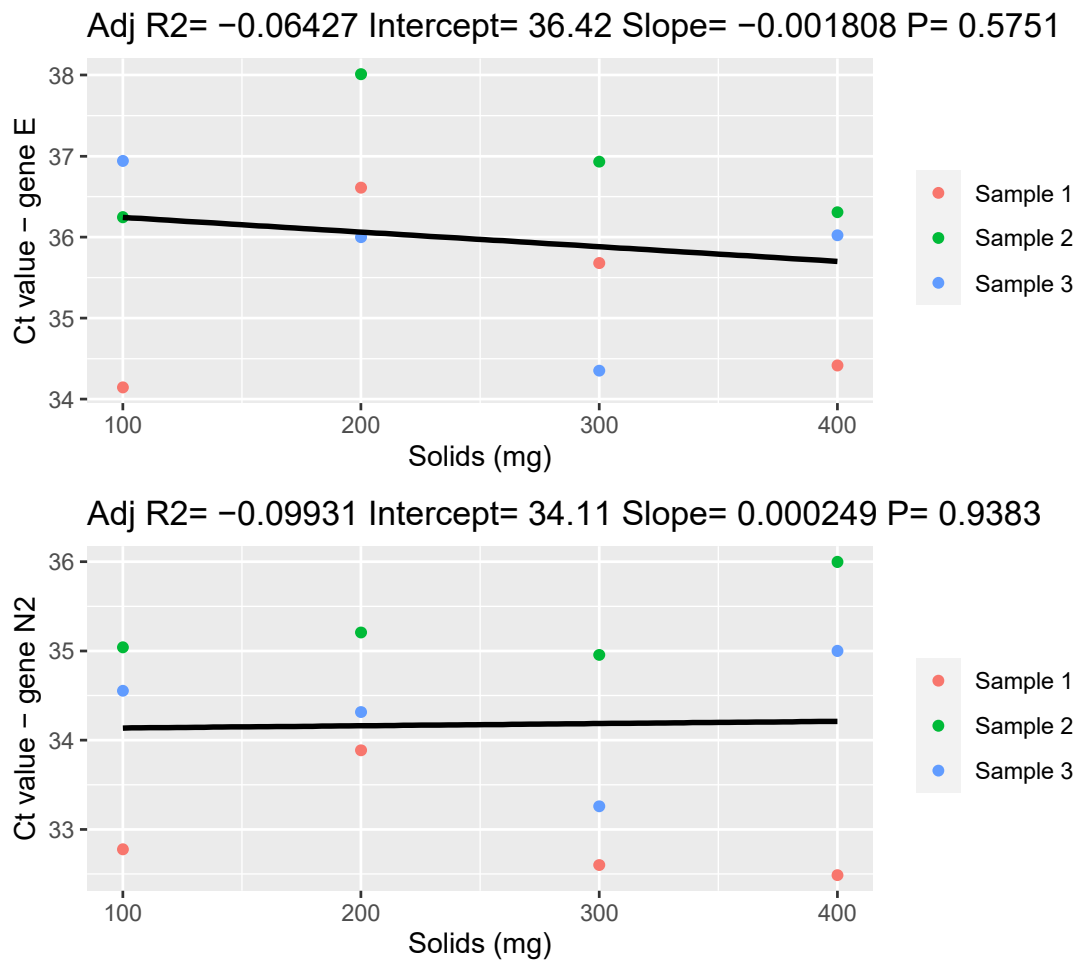

**Figure S1. Increasing solid input sample had no effect on Ct values of SARS-CoV-2 RT-qPCR detection in wastewater.** Results for the liquid fraction are shown as “0 mg”. Sample 2 tested negative for gene N2 on the liquid fraction. Results from fitting a linear regression model are shown (adjusted  $R^2$ ,  $y$ -intercept, slope and  $p$ -value for the slope). Changes in Ct values as solid weight increased (slope) were not statistically significant.
