# Supplementary material
Source: MDPI journal article supplement (https://www.mdpi.com/2073-4441/13/16/2166)
Supplement: s1 [file s1 › FigureS2.pdf]

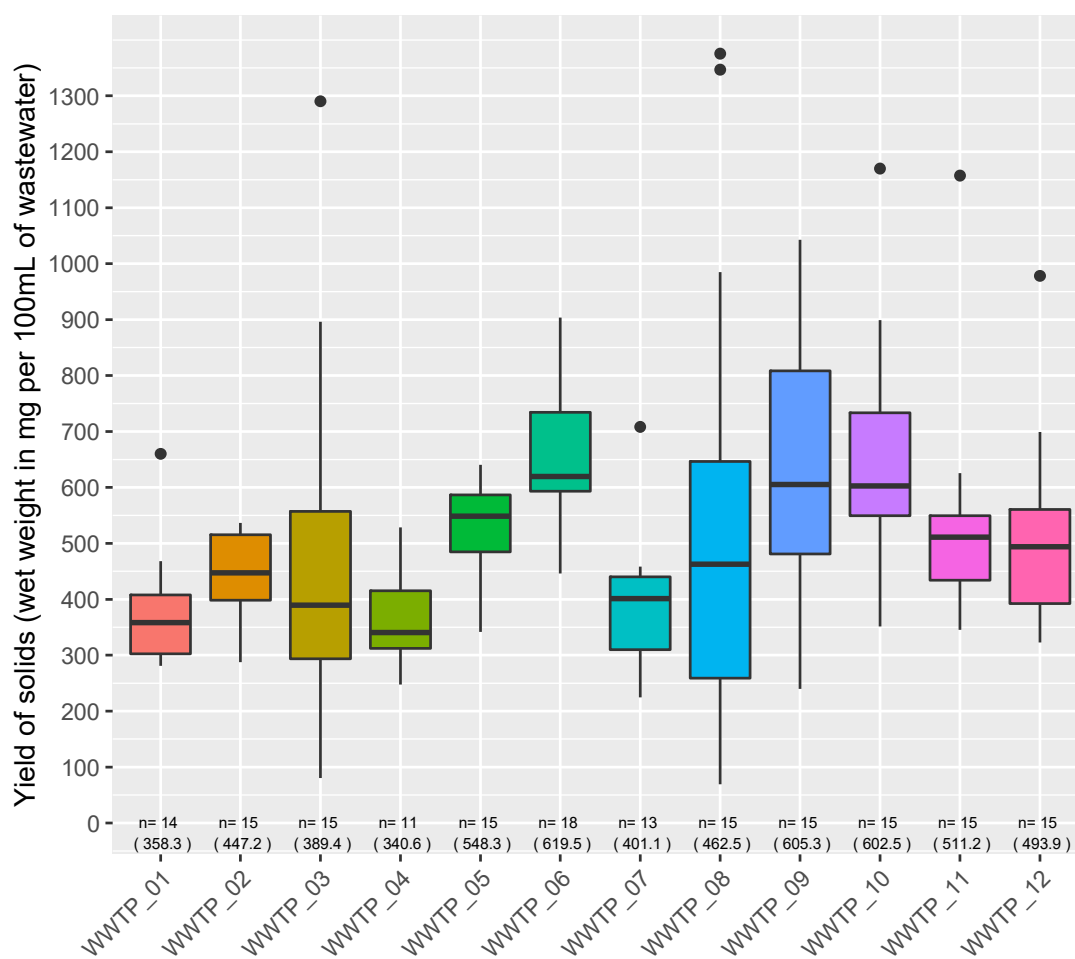

**Figure S2. Yield of wet solid per 100 ml of post-grit influent by wastewater treatment plant.** Post-grit influent samples (100 ml) were centrifuged at 4,500 x *g* for 10 min, the liquid fraction was removed, and the weight of wet solid was recorded. Data shown is representative of 176 samples. The yield of wet solid differed between WWTPs (ANOVA,  $p < 0.0001$ ).
