# Supplementary material
Source: MDPI journal article supplement (https://www.mdpi.com/2073-4441/13/16/2166)
Supplement: s1 [file s1 › Table S2.xlsx]

## Sheet: qPCRvsSolidWeight_test1
		CT values
Sample_coded	Weight_pellet_mg	E-rep1	E-rep2	E avg	N2-rep1	N2-rep2	N2 avg	229E	Salmon
Sample_1	ultrafiltration	37.1785	-	37.1785	35.7407		35.7407	28.6329	28.3093
Sample_1	100	34.3568	33.9339	34.1454	32.3631	33.1922	32.7776	32.3586	Neg
Sample_1	200	36.4227	36.8003	36.6115	33.2975	34.4773	33.8874	34.1473	Neg
Sample_1	300	35.4051	35.9552	35.6801	32.6127	32.5926	32.6027	34.0273	Neg
Sample_1	400	34.6859	34.1461	34.416	32.3216	32.6553	32.4885	34.6164	Neg
Sample_2	ultrafiltration	36.998	-	36.998	Neg		Neg	29.8723	28.2023
Sample_2	100	35.9419	36.5507	36.2463	35.8642	34.2182	35.0412	35.3789	Neg
Sample_2	200	38.0118	Neg	38.0118	34.6654	35.7502	35.2078	35.2567	Neg
Sample_2	300	Neg	36.9307	36.9307	34.9553	Neg	34.9553	35.6706	Neg
Sample_2	400	Neg	36.3073	36.3073	Neg	35.997	35.997	Neg	44.5057
Sample_3	ultrafiltration	35.1536	-	35.1536	32.5079		32.5079	29.6568	28.9509
Sample_3	100	36.9416	Neg	36.9416	34.8614	34.2454	34.5534	34.728	Neg
Sample_3	200	35.9822	36.0173	35.9998	34.5849	34.0465	34.3157	31.6159	Neg
Sample_3	300	34.5241	34.1797	34.3519	32.9599	33.56	33.2599	33.0791	33.9325
Sample_3	400	35.9941	36.0512	36.0226	35.0002	Neg	35.0002	33.3864	30.7124

## Sheet: Summary_50vs100_pHadjvsNopHadj
Sample_coded	50mg solids pH not adjusted	100mg solids pH not adjusted	50mg solids pH adjusted	100mg solids pH adjusted	Ultrafiltration
WWTP_01_201021	NEG	NEG	NEG	NEG	NEG
WWTP_01_201023	NEG	NEG	NEG	NEG	NEG
WWTP_01_201026	NEG	NEG	NEG	NEG	NEG
WWTP_01_201028	NEG	NEG	not tested	NEG	NEG
WWTP_01_201030	NEG	not tested	NEG	NEG	NEG
WWTP_01_201102	NEG	not tested	NEG	NEG	NEG
WWTP_02_201018	POS	NEG	NEG	POS	NEG
WWTP_02_201020	NEG	POS	POS	POS	POS
WWTP_02_201022	NEG	POS	POS	POS	POS
WWTP_02_201025	NEG	NEG	NEG	NEG	NEG
WWTP_02_201027	POS	POS	NEG	POS	POS
WWTP_02_201029	NEG	POS	POS	POS	POS
WWTP_03_201021	NEG	NEG	NEG	NEG	NEG
WWTP_03_201023	NEG	NEG	NEG	NEG	NEG
WWTP_03_201026	NEG	NEG	NEG	NEG	NEG
WWTP_03_201028	NEG	NEG	NEG	NEG	NEG
WWTP_03_201030	NEG	NEG	NEG	NEG	NEG
WWTP_03_201102	POS	POS	NEG	NEG	NEG
WWTP_04_201026	NEG	NEG	POS	NEG	POS
WWTP_04_201028	NEG	POS	NEG	POS	POS
WWTP_04_201030	NEG	POS	NEG	POS	POS
WWTP_04_201102	POS	POS	NEG	NEG	POS
WWTP_04_201104	POS	POS	POS	NEG	POS
WWTP_04_201106	POS	POS	NEG	NEG	POS
WWTP_05_201018	POS	POS	POS	POS	NEG
WWTP_05_201020	POS	POS	NEG	NEG	NEG
WWTP_05_201022	NEG	NEG	NEG	NEG	POS
WWTP_05_201025	NEG	POS	NEG	NEG	NEG
WWTP_05_201027	POS	NEG	NEG	NEG	POS
WWTP_05_201029	POS	POS	NEG	NEG	NEG
WWTP_06_201023	NEG	POS	NEG	NEG	NEG
WWTP_06_201026	NEG	NEG	NEG	POS	NEG
WWTP_06_201028	POS	POS	NEG	POS	POS
WWTP_06_201030	NEG	POS	POS	POS	NEG
WWTP_06_201102	POS	POS	NEG	POS	POS
WWTP_06_201104	POS	POS	POS	POS	POS
WWTP_07_201016	NEG	NEG	POS	NEG	NEG
WWTP_07_201019	NEG	NEG	NEG	NEG	NEG
WWTP_07_201021	NEG	POS	POS	NEG	NEG
WWTP_07_201023	POS	POS	NEG	POS	NEG
WWTP_07_201026	NEG	POS	POS	NEG	POS
WWTP_07_201028	POS	POS	POS	NEG	NEG
WWTP_07_201030	POS	POS	NEG	POS	NEG
WWTP_08_201019	NEG	NEG	POS	NEG	NEG
WWTP_08_201021	NEG	NEG	NEG	NEG	NEG
WWTP_08_201023	NEG	not tested	NEG	not tested	NEG
WWTP_08_201026	NEG	NEG	NEG	NEG	NEG
WWTP_08_201028	NEG	not tested	NEG	not tested	NEG
WWTP_08_201030	NEG	not tested	NEG	not tested	NEG
WWTP_09_201022	POS	NEG	NEG	NEG	POS
WWTP_09_201025	NEG	POS	NEG	NEG	NEG
WWTP_09_201027	POS	NEG	NEG	NEG	POS
WWTP_09_201029	POS	NEG	NEG	NEG	NEG
WWTP_09_201101	POS	NEG	NEG	NEG	POS
WWTP_09_201103	NEG	NEG	POS	NEG	POS
WWTP_10_201019	NEG	NEG	NEG	NEG	NEG
WWTP_10_201021	NEG	NEG	NEG	NEG	NEG
WWTP_10_201023	NEG	NEG	NEG	NEG	NEG
WWTP_10_201026	NEG	NEG	NEG	NEG	NEG
WWTP_10_201028	NEG	NEG	NEG	NEG	NEG
WWTP_10_201030	NEG	NEG	NEG	NEG	NEG
WWTP_11_201018	NEG	NEG	NEG	NEG	NEG
WWTP_11_201020	NEG	NEG	NEG	POS	POS
WWTP_11_201022	POS	POS	POS	POS	NEG
WWTP_11_201025	NEG	NEG	NEG	POS	POS
WWTP_11_201027	POS	NEG	POS	POS	POS
WWTP_11_201029	POS	POS	NEG	POS	POS
WWTP_12_201019	NEG	NEG	NEG	NEG	NEG
WWTP_12_201021	POS	NEG	NEG	NEG	POS
WWTP_12_201023	NEG	NEG	NEG	NEG	NEG
WWTP_12_201026	NEG	NEG	NEG	NEG	NEG
WWTP_12_201028	NEG	POS	NEG	NEG	NEG
WWTP_12_201030	NEG	POS	NEG	NEG	POS

## Sheet: Solid_Yield
WWTP	Sample_coded	Input_wastewater_volume (ml)	pH_adjusted	WeightPellet_mg
WWTP_01	WWTP_01_201021	100	no	410.2
WWTP_01	WWTP_01_201023	100	no	377.5
WWTP_01	WWTP_01_201026	100	no	401.4
WWTP_01	WWTP_01_201028	100	no	465.9
WWTP_01	WWTP_01_201030	100	no	286.8
WWTP_01	WWTP_01_201102	100	no	364.3
WWTP_01	WWTP_01_201113	100	no	660.2
WWTP_01	WWTP_01_201116	100	no	468.3
WWTP_01	WWTP_01_201118	100	no	281
WWTP_01	WWTP_01_201120	100	no	306.9
WWTP_01	WWTP_01_201123	100	no	301.1
WWTP_01	WWTP_01_201125	100	no	352.2
WWTP_01	WWTP_01_201127	100	no	290
WWTP_01	WWTP_01_201130	100	no	325
WWTP_02	WWTP_02_201018	100	no	369.8
WWTP_02	WWTP_02_201020	100	no	287.4
WWTP_02	WWTP_02_201022	100	no	447.2
WWTP_02	WWTP_02_201025	100	no	519.2
WWTP_02	WWTP_02_201027	100	no	399.6
WWTP_02	WWTP_02_201029	100	no	479.7
WWTP_02	WWTP_02_201108	100	no	324
WWTP_02	WWTP_02_201110	100	no	397.5
WWTP_02	WWTP_02_201112	100	no	412.9
WWTP_02	WWTP_02_201115	100	no	513.8
WWTP_02	WWTP_02_201117	100	no	516.9
WWTP_02	WWTP_02_201119	100	no	529.2
WWTP_02	WWTP_02_201122	100	no	536.7
WWTP_02	WWTP_02_201124	100	no	489.4
WWTP_02	WWTP_02_201126	100	no	428.9
WWTP_03	WWTP_03_201021	100	no	389.4
WWTP_03	WWTP_03_201023	100	no	367.1
WWTP_03	WWTP_03_201026	100	no	513.6
WWTP_03	WWTP_03_201028	100	no	565.6
WWTP_03	WWTP_03_201030	100	no	549.1
WWTP_03	WWTP_03_201102	100	no	504.1
WWTP_03	WWTP_03_201111	100	no	1290.4
WWTP_03	WWTP_03_201113	100	no	896.2
WWTP_03	WWTP_03_201116	100	no	698.3
WWTP_03	WWTP_03_201118	100	no	138.3
WWTP_03	WWTP_03_201120	100	no	244.7
WWTP_03	WWTP_03_201123	100	no	360.1
WWTP_03	WWTP_03_201125	100	no	312.2
WWTP_03	WWTP_03_201127	100	no	80.4
WWTP_03	WWTP_03_201130	100	no	274.6
WWTP_04	WWTP_04_201026	100	no	325.4
WWTP_04	WWTP_04_201028	100	no	442.7
WWTP_04	WWTP_04_201030	100	no	340.6
WWTP_04	WWTP_04_201102	100	no	297.8
WWTP_04	WWTP_04_201104	100	no	300.5
WWTP_04	WWTP_04_201106	100	no	355.1
WWTP_04	WWTP_04_201116	100	no	434
WWTP_04	WWTP_04_201118	100	no	247.4
WWTP_04	WWTP_04_201120	100	no	323.8
WWTP_04	WWTP_04_201123	100	no	528.6
WWTP_04	WWTP_04_201125	100	no	396.6
WWTP_05	WWTP_05_201018	100	no	472.7
WWTP_05	WWTP_05_201020	100	no	580.7
WWTP_05	WWTP_05_201022	100	no	548.3
WWTP_05	WWTP_05_201025	100	no	577
WWTP_05	WWTP_05_201027	100	no	496.8
WWTP_05	WWTP_05_201029	100	no	547.1
WWTP_05	WWTP_05_201108	100	no	384.9
WWTP_05	WWTP_05_201110	100	no	341.6
WWTP_05	WWTP_05_201112	100	no	592.4
WWTP_05	WWTP_05_201115	100	no	640.6
WWTP_05	WWTP_05_201117	100	no	351.8
WWTP_05	WWTP_05_201119	100	no	633.9
WWTP_05	WWTP_05_201122	100	no	628.8
WWTP_05	WWTP_05_201124	100	no	567.1
WWTP_05	WWTP_05_201126	100	no	532.3
WWTP_06	WWTP_06_201026	100	no	629.9
WWTP_06	WWTP_06_201028	100	no	741.3
WWTP_06	WWTP_06_201023	100	no	903.4
WWTP_06	WWTP_06_201030	100	no	813.3
WWTP_06	WWTP_06_201102	100	no	727.1
WWTP_06	WWTP_06_201104	100	no	846.2
WWTP_06	WWTP_06_201113	100	no	596.9
WWTP_06	WWTP_06_201116	100	no	591.7
WWTP_06	WWTP_06_201118	100	no	604.4
WWTP_06	WWTP_06_201106	100	no	463.8
WWTP_06	WWTP_06_201109	100	no	446.1
WWTP_06	WWTP_06_201111	100	no	530.5
WWTP_06	WWTP_06_201120	100	no	609.2
WWTP_06	WWTP_06_201123	100	no	647.5
WWTP_06	WWTP_06_201125	100	no	736.7
WWTP_06	WWTP_06_201127	100	no	608
WWTP_06	WWTP_06_201130	100	no	541.4
WWTP_06	WWTP_06_201202	100	no	698.5
WWTP_07	WWTP_07_201016	100	no	242.8
WWTP_07	WWTP_07_201019	100	no	309.9
WWTP_07	WWTP_07_201021	100	no	329.8
WWTP_07	WWTP_07_201023	100	no	455.3
WWTP_07	WWTP_07_201026	100	no	458.3
WWTP_07	WWTP_07_201028	100	no	351.3
WWTP_07	WWTP_07_201030	100	no	708.2
WWTP_07	WWTP_07_201116	100	no	421.7
WWTP_07	WWTP_07_201118	100	no	422.1
WWTP_07	WWTP_07_201120	100	no	401.1
WWTP_07	WWTP_07_201123	100	no	291.6
WWTP_07	WWTP_07_201125	100	no	224.6
WWTP_07	WWTP_07_201127	100	no	440.1
WWTP_08	WWTP_08_201019	100	no	984.9
WWTP_08	WWTP_08_201021	100	no	1375.5
WWTP_08	WWTP_08_201023	100	no	411.4
WWTP_08	WWTP_08_201026	100	no	1346.8
WWTP_08	WWTP_08_201028	100	no	316.2
WWTP_08	WWTP_08_201030	100	no	561.3
WWTP_08	WWTP_08_201109	100	no	473.3
WWTP_08	WWTP_08_201111	100	no	462.5
WWTP_08	WWTP_08_201113	100	no	201.9
WWTP_08	WWTP_08_201116	100	no	397.8
WWTP_08	WWTP_08_201118	100	no	684.9
WWTP_08	WWTP_08_201120	100	no	106.2
WWTP_08	WWTP_08_201123	100	no	607.8
WWTP_08	WWTP_08_201125	100	no	116.1
WWTP_08	WWTP_08_201127	100	no	69.2
WWTP_09	WWTP_09_201022	100	no	819.6
WWTP_09	WWTP_09_201025	100	no	552
WWTP_09	WWTP_09_201027	100	no	499.1
WWTP_09	WWTP_09_201029	100	no	629.3
WWTP_09	WWTP_09_201101	100	no	605.3
WWTP_09	WWTP_09_201103	100	no	765
WWTP_09	WWTP_09_201112	100	no	460.2
WWTP_09	WWTP_09_201115	100	no	797
WWTP_09	WWTP_09_201117	100	no	530.5
WWTP_09	WWTP_09_201119	100	no	1042.8
WWTP_09	WWTP_09_201122	100	no	881.7
WWTP_09	WWTP_09_201124	100	no	939.4
WWTP_09	WWTP_09_201126	100	no	446.8
WWTP_09	WWTP_09_201129	100	no	239.6
WWTP_09	WWTP_09_201201	100	no	462.9
WWTP_10	WWTP_10_201019	100	no	577.5
WWTP_10	WWTP_10_201021	100	no	566
WWTP_10	WWTP_10_201023	100	no	606.6
WWTP_10	WWTP_10_201026	100	no	898.9
WWTP_10	WWTP_10_201028	100	no	614.1
WWTP_10	WWTP_10_201030	100	no	1170
WWTP_10	WWTP_10_201109	100	no	479.4
WWTP_10	WWTP_10_201111	100	no	351.5
WWTP_10	WWTP_10_201113	100	no	532.9
WWTP_10	WWTP_10_201116	100	no	704.9
WWTP_10	WWTP_10_201118	100	no	602.5
WWTP_10	WWTP_10_201120	100	no	761.7
WWTP_10	WWTP_10_201123	100	no	600.4
WWTP_10	WWTP_10_201125	100	no	828.7
WWTP_10	WWTP_10_201127	100	no	478.1
WWTP_11	WWTP_11_201018	100	no	391
WWTP_11	WWTP_11_201020	100	no	366.6
WWTP_11	WWTP_11_201022	100	no	345.6
WWTP_11	WWTP_11_201025	100	no	511.2
WWTP_11	WWTP_11_201027	100	no	560.8
WWTP_11	WWTP_11_201029	100	no	1157.6
WWTP_11	WWTP_11_201108	100	no	499.8
WWTP_11	WWTP_11_201110	100	no	538.3
WWTP_11	WWTP_11_201112	100	no	625.5
WWTP_11	WWTP_11_201115	100	no	516
WWTP_11	WWTP_11_201117	100	no	563.8
WWTP_11	WWTP_11_201119	100	no	525.9
WWTP_11	WWTP_11_201122	100	no	477.3
WWTP_11	WWTP_11_201124	100	no	382.9
WWTP_11	WWTP_11_201126	100	no	490.5
WWTP_12	WWTP_12_201019	100	no	584.4
WWTP_12	WWTP_12_201021	100	no	699.3
WWTP_12	WWTP_12_201023	100	no	583.4
WWTP_12	WWTP_12_201026	100	no	537.6
WWTP_12	WWTP_12_201028	100	no	493.9
WWTP_12	WWTP_12_201030	100	no	388.6
WWTP_12	WWTP_12_201109	100	no	978.3
WWTP_12	WWTP_12_201111	100	no	369.9
WWTP_12	WWTP_12_201113	100	no	395.6
WWTP_12	WWTP_12_201116	100	no	530.8
WWTP_12	WWTP_12_201118	100	no	322.8
WWTP_12	WWTP_12_201120	100	no	372.5
WWTP_12	WWTP_12_201123	100	no	404
WWTP_12	WWTP_12_201125	100	no	533.2
WWTP_12	WWTP_12_201127	100	no	433.2

## Sheet: SalmonDNAresults
Sample_code	Ultrafiltration_Salmon_Ct	Liquid Salmon_interpretation		Sample_code	100mgSolids_Salmon_Ct	100mgSolids_Salmon_interpretation		Sample_code	20mLSolids_Salmon_Ct	20mLSolids_Salmon_interpretation
WWTP_09_201022	26.2783	POS		WWTP_09_201126	26.2059	POS		WWTP_01_201214	26.9904	POS
WWTP_03_201030	26.4088	POS		WWTP_07_201116	26.8933	POS		WWTP_01_201211	27.1163	POS
WWTP_07_201118	26.4841	POS		WWTP_06_201202	27.6929	POS		WWTP_08_201125	27.2575	POS
WWTP_08_201109	26.5713	POS		WWTP_10_201127	27.6991	POS		WWTP_06_201214	27.2644	POS
WWTP_09_201115	26.6731	POS		WWTP_09_201124	27.7564	POS		WWTP_08_201211	27.3071	POS
WWTP_02_201115	26.851	POS		WWTP_09_201119	27.7897	POS		WWTP_03_201202	27.394	POS
WWTP_12_201111	26.8611	POS		WWTP_01_201125	27.8629	POS		WWTP_12_201211	27.4025	POS
WWTP_07_201116	26.8662	POS		WWTP_12_201125	27.8864	POS		WWTP_12_201202	27.4272	POS
WWTP_04_201120	26.8986	POS		WWTP_11_201126	27.8992	POS		WWTP_12_201207	27.4339	POS
WWTP_04_201118	26.9517	POS		WWTP_09_201122	27.9494	POS		WWTP_08_201204	27.548	POS
WWTP_11_201117	26.9552	POS		WWTP_01_201127	27.9507	POS		WWTP_08_201209	27.5792	POS
WWTP_12_201026	26.9722	POS		WWTP_04_201116	28.0005	POS		WWTP_12_201209	27.5931	POS
WWTP_03_201028	26.9867	POS		WWTP_09_201117	28.056	POS		WWTP_10_201207	27.6116	POS
WWTP_05_201110	26.9872	POS		WWTP_01_201130	28.0668	POS		WWTP_09_201203	27.6276	POS
WWTP_05_201029	27.1067	POS		WWTP_07_201123	28.0709	POS		WWTP_01_201209	27.6291	POS
WWTP_05_201027	27.1454	POS		WWTP_04_201125	28.0787	POS		WWTP_08_201207	27.6327	POS
WWTP_08_201019	27.1588	POS		WWTP_12_201118	28.0914	POS		WWTP_07_201204	27.6633	POS
WWTP_12_201109	27.188	POS		WWTP_09_201115	28.0941	POS		WWTP_01_201204	27.6702	POS
WWTP_09_201112	27.1955	POS		WWTP_11_201124	28.1213	POS		WWTP_12_201125	27.6781	POS
WWTP_12_201028	27.2213	POS		WWTP_09_201112	28.1391	POS		WWTP_05_201203	27.6789	POS
WWTP_01_201026	27.2213	POS		WWTP_11_201122	28.1671	POS		WWTP_11_201206	27.7066	POS
WWTP_05_201112	27.2396	POS		WWTP_03_201111	28.2017	POS		WWTP_06_201130	27.7217	POS
WWTP_09_201117	27.2543	POS		WWTP_06_201130	28.2029	POS		WWTP_05_201129	27.7405	POS
WWTP_06_201111	27.2569	POS		WWTP_12_201127	28.2078	POS		WWTP_07_201208	27.7548	POS
WWTP_01_201116	27.2822	POS		WWTP_09_201201	28.2083	POS		WWTP_12_201127	27.7569	POS
WWTP_03_201021	27.3019	POS		WWTP_05_201122	28.2254	POS		WWTP_01_201202	27.7687	POS
WWTP_02_201117	27.3055	POS		WWTP_08_201116	28.2273	POS		WWTP_11_201201	27.7715	POS
WWTP_01_201113	27.3092	POS		WWTP_07_201118	28.2336	POS		WWTP_11_201210	27.7883	POS
WWTP_07_201120	27.317	POS		WWTP_11_201117	28.2403	POS		WWTP_04_201207	27.8234	POS
WWTP_06_201106	27.3201	POS		WWTP_02_201115	28.263	POS		WWTP_03_201207	27.8319	POS
WWTP_01_201021	27.3381	POS		WWTP_08_201123	28.3066	POS		WWTP_12_201130	27.8334	POS
WWTP_08_201023	27.3432	POS		WWTP_03_201130	28.3228	POS		WWTP_01_201130	27.8389	POS
WWTP_12_201113	27.3587	POS		WWTP_08_201111	28.3244	POS		WWTP_12_201204	27.8391	POS
WWTP_11_201018	27.3892	POS		WWTP_07_201125	28.3645	POS		WWTP_09_201206	27.8417	POS
WWTP_08_201111	27.3949	POS		WWTP_01_201113	28.4318	POS		WWTP_07_201207	27.8457	POS
WWTP_06_201026	27.4078	POS		WWTP_11_201115	28.4452	POS		WWTP_07_201130	27.8511	POS
WWTP_06_201102	27.4172	POS		WWTP_12_201109	28.4824	POS		WWTP_04_201216	27.8653	POS
WWTP_03_201111	27.4206	POS		WWTP_07_201120	28.504	POS		WWTP_06_201209	27.8819	POS
WWTP_05_201020	27.4228	POS		WWTP_03_201116	28.5545	POS		WWTP_06_201202	27.905	POS
WWTP_01_201023	27.4457	POS		WWTP_02_201122	28.5795	POS		WWTP_05_201210	27.9062	POS
WWTP_12_201019	27.4536	POS		WWTP_12_201123	28.5844	POS		WWTP_03_201127	27.9105	POS
WWTP_06_201030	27.4933	POS		WWTP_12_201120	28.6077	POS		WWTP_05_201126	27.9134	POS
WWTP_01_201102	27.4984	POS		WWTP_02_201117	28.7142	POS		WWTP_04_201211	27.93	POS
WWTP_05_201025	27.504	POS		WWTP_05_201115	28.7268	POS		WWTP_11_201129	27.9567	POS
WWTP_07_201019	27.5226	POS		WWTP_05_201126	28.7394	POS		WWTP_04_201130	27.9837	POS
WWTP_09_201103	27.53	POS		WWTP_02_201119	28.8004	POS		WWTP_08_201130	27.9889	POS
WWTP_09_201101	27.5342	POS		WWTP_03_201113	28.807	POS		WWTP_07_201120	27.9938	POS
WWTP_07_201016	27.539	POS		WWTP_06_201125	28.8639	POS		WWTP_09_201122	27.9957	POS
WWTP_01_201028	27.5552	POS		WWTP_01_201123	28.8671	POS		WWTP_05_201208	28.0016	POS
WWTP_05_201018	27.5588	POS		WWTP_08_201118	28.8874	POS		WWTP_09_201129	28.0585	POS
WWTP_03_201102	27.5628	POS		WWTP_02_201126	28.9522	POS		WWTP_01_201127	28.079	POS
WWTP_01_201209	27.5738	POS		WWTP_05_201124	28.9767	POS		WWTP_07_201202	28.0792	POS
WWTP_02_201112	27.5755	POS		WWTP_05_201110	29.0579	POS		WWTP_06_201207	28.0816	POS
WWTP_09_201025	27.5961	POS		WWTP_06_201127	29.0896	POS		WWTP_10_201130	28.0856	POS
WWTP_12_201030	27.6031	POS		WWTP_05_201119	29.1558	POS		WWTP_06_201204	28.0859	POS
WWTP_05_201022	27.6097	POS		WWTP_04_201118	29.1761	POS		WWTP_10_201211	28.0981	POS
WWTP_03_201026	27.6115	POS		WWTP_06_201116	29.3477	POS		WWTP_01_201207	28.1031	POS
WWTP_03_201113	27.6328	POS		WWTP_02_201108	29.3687	POS		WWTP_08_201116	28.1038	POS
WWTP_07_201204	27.6332	POS		WWTP_06_201120	29.3963	POS		WWTP_07_201125	28.1178	POS
WWTP_12_201207	27.6358	POS		WWTP_10_201118	29.4811	POS		WWTP_11_201203	28.1186	POS
WWTP_06_201113	27.6362	POS		WWTP_05_201108	29.5104	POS		WWTP_11_201122	28.1245	POS
WWTP_11_201025	27.6387	POS		WWTP_10_201123	29.5855	POS		WWTP_05_201122	28.1312	POS
WWTP_01_201030	27.6614	POS		WWTP_02_201110	29.5978	POS		WWTP_09_201126	28.1319	POS
WWTP_12_201021	27.6682	POS		WWTP_06_201123	29.6068	POS		WWTP_04_201214	28.1347	POS
WWTP_06_201214	27.6865	POS		WWTP_10_201116	29.6409	POS		WWTP_09_201208	28.1392	POS
WWTP_12_201209	27.6893	POS		WWTP_05_201112	29.6505	POS		WWTP_05_201201	28.1483	POS
WWTP_05_201203	27.6896	POS		WWTP_11_201108	29.6582	POS		WWTP_06_201127	28.1548	POS
WWTP_11_201027	27.692	POS		WWTP_06_201113	29.6885	POS		WWTP_04_201125	28.1665	POS
WWTP_11_201022	27.694	POS		WWTP_06_201118	29.706	POS		WWTP_10_201127	28.1756	POS
WWTP_10_201021	27.6958	POS		WWTP_02_201124	29.8584	POS		WWTP_02_201206	28.1968	POS
WWTP_05_201124	27.7035	POS		WWTP_01_201116	29.8632	POS		WWTP_04_201123	28.1968	POS
WWTP_10_201023	27.7042	POS		WWTP_01_201120	29.8813	POS		WWTP_02_201129	28.1982	POS
WWTP_09_201027	27.7139	POS		WWTP_04_201120	30.0177	POS		WWTP_10_201209	28.2106	POS
WWTP_01_201211	27.7353	POS		WWTP_06_201109	30.1921	POS		WWTP_02_201201	28.2262	POS
WWTP_06_201109	27.7544	POS		WWTP_08_201109	30.198	POS		WWTP_06_201211	28.2379	POS
WWTP_10_201030	27.7549	POS		WWTP_10_201120	30.2677	POS		WWTP_02_201119	28.2611	POS
WWTP_04_201116	27.7672	POS		WWTP_11_201110	30.4049	POS		WWTP_01_201125	28.2748	POS
WWTP_10_201026	27.8133	POS		WWTP_12_201113	30.4706	POS		WWTP_02_201210	28.2784	POS
WWTP_03_201023	27.8154	POS		WWTP_10_201109	30.5341	POS		WWTP_04_201120	28.295	POS
WWTP_09_201119	27.8177	POS		WWTP_11_201112	30.6822	POS		WWTP_12_201123	28.3039	POS
WWTP_06_201116	27.8339	POS		WWTP_02_201112	30.844	POS		WWTP_08_201127	28.3111	POS
WWTP_07_201130	27.8373	POS		WWTP_06_201111	31.3365	POS		WWTP_03_201130	28.3126	POS
WWTP_07_201028	27.8423	POS		WWTP_12_201111	31.3664	POS		WWTP_02_201115	28.3162	POS
WWTP_11_201029	27.8434	POS		WWTP_10_201113	31.3872	POS		WWTP_09_201124	28.3221	POS
WWTP_10_201028	27.8528	POS		WWTP_10_201111	31.4201	POS		WWTP_04_201118	28.3345	POS
WWTP_07_201021	27.8593	POS		WWTP_06_201106	33.8499	POS		WWTP_11_201208	28.3564	POS
WWTP_08_201211	27.8694	POS		WWTP_10_201125	42.486	delayed or neg		WWTP_10_201125	28.376	POS
WWTP_08_201209	27.8723	POS		WWTP_01_201118	Negative	delayed or neg		WWTP_02_201203	28.3941	POS
WWTP_11_201203	27.8784	POS		WWTP_03_201120	Negative	delayed or neg		WWTP_05_201124	28.3995	POS
WWTP_02_201110	27.9062	POS		WWTP_03_201123	Negative	delayed or neg		WWTP_12_201118	28.4068	POS
WWTP_09_201203	27.9115	POS		WWTP_03_201125	Negative	delayed or neg		WWTP_11_201126	28.4583	POS
WWTP_07_201207	27.9146	POS		WWTP_04_201123	Negative	delayed or neg		WWTP_11_201124	28.4707	POS
WWTP_12_201023	27.9258	POS		WWTP_05_201117	Negative	delayed or neg		WWTP_08_201123	28.4892	POS
WWTP_11_201108	27.9283	POS		WWTP_07_201127	Negative	delayed or neg		WWTP_03_201120	28.5148	POS
WWTP_01_201214	27.9392	POS		WWTP_11_201119	Negative	delayed or neg		WWTP_11_201117	28.5192	POS
WWTP_08_201204	27.9431	POS		WWTP_12_201116	Negative	delayed or neg		WWTP_03_201204	28.5466	POS
WWTP_06_201204	27.9493	POS						WWTP_04_201202	28.5574	POS
WWTP_12_201211	27.9594	POS						WWTP_01_201118	28.5594	POS
WWTP_02_201119	27.9673	POS						WWTP_09_201201	28.5641	POS
WWTP_06_201211	27.9964	POS						WWTP_02_201208	28.5743	POS
WWTP_01_201127	28.007	POS						WWTP_12_201116	28.5885	POS
WWTP_11_201129	28.0124	POS						WWTP_04_201204	28.6077	POS
WWTP_03_201202	28.015	POS						WWTP_08_201120	28.6083	POS
WWTP_11_201206	28.0177	POS						WWTP_09_201119	28.6102	POS
WWTP_01_201130	28.0303	POS						WWTP_07_201118	28.6572	POS
WWTP_07_201127	28.039	POS						WWTP_10_201204	28.6714	POS
WWTP_12_201202	28.05	POS						WWTP_10_201118	28.6724	POS
WWTP_01_201204	28.0527	POS						WWTP_03_201209	28.6748	POS
WWTP_11_201210	28.0606	POS						WWTP_02_201122	28.6895	POS
WWTP_05_201108	28.0608	POS						WWTP_02_201126	28.7431	POS
WWTP_08_201123	28.0666	POS						WWTP_06_201216	28.7735	POS
WWTP_07_201202	28.0822	POS						WWTP_11_201119	28.7793	POS
WWTP_03_201209	28.0943	POS						WWTP_04_201116	28.8218	POS
WWTP_12_201125	28.0949	POS						WWTP_05_201115	28.8582	POS
WWTP_05_201206	28.1147	POS						WWTP_12_201120	28.8684	POS
WWTP_07_201023	28.1681	POS						WWTP_08_201118	28.8739	POS
WWTP_08_201125	28.1915	POS						WWTP_01_201120	28.8819	POS
WWTP_10_201019	28.2022	POS						WWTP_07_201127	28.9596	POS
WWTP_01_201125	28.2038	POS						WWTP_07_201123	29.0145	POS
WWTP_10_201127	28.2062	POS						WWTP_02_201124	29.0256	POS
WWTP_03_201207	28.2312	POS						WWTP_08_201202	29.036	POS
WWTP_01_201207	28.2359	POS						WWTP_11_201115	29.0478	POS
WWTP_11_201124	28.2453	POS						WWTP_06_201120	29.093	POS
WWTP_09_201208	28.2629	POS						WWTP_05_201117	29.1271	POS
WWTP_08_201021	28.2659	POS						WWTP_02_201117	29.2477	POS
WWTP_10_201123	28.2698	POS						WWTP_10_201120	29.3056	POS
WWTP_06_201207	28.2832	POS						WWTP_06_201125	29.4138	POS
WWTP_09_201122	28.2917	POS						WWTP_05_201119	29.4348	POS
WWTP_08_201127	28.2968	POS						WWTP_06_201123	29.6449	POS
WWTP_11_201122	28.2981	POS						WWTP_03_201123	29.8633	POS
WWTP_07_201125	28.299	POS						WWTP_03_201118	29.9641	POS
WWTP_12_201123	28.312	POS						WWTP_10_201123	30.0375	POS
WWTP_07_201208	28.3176	POS						WWTP_10_201116	30.2972	POS
WWTP_05_201210	28.3197	POS						WWTP_03_201125	30.3599	POS
WWTP_09_201201	28.3247	POS						WWTP_07_201116	31.5479	POS
WWTP_11_201208	28.3301	POS						WWTP_01_201123	Negative	delayed or neg
WWTP_10_201113	28.344	POS						WWTP_04_201209	Negative	delayed or neg
WWTP_10_201111	28.3467	POS						WWTP_05_201206	Negative	delayed or neg
WWTP_09_201124	28.3479	POS						WWTP_10_201202	Negative	delayed or neg
WWTP_02_201206	28.3485	POS
WWTP_12_201130	28.3608	POS
WWTP_04_201123	28.3674	POS
WWTP_02_201208	28.3704	POS
WWTP_09_201129	28.3747	POS
WWTP_02_201108	28.3875	POS
WWTP_02_201129	28.3957	POS
WWTP_09_201206	28.3967	POS
WWTP_08_201026	28.4018	POS
WWTP_03_201127	28.4251	POS
WWTP_02_201122	28.4306	POS
WWTP_07_201123	28.4376	POS
WWTP_11_201020	28.4395	POS
WWTP_03_201130	28.4653	POS
WWTP_02_201203	28.47	POS
WWTP_11_201126	28.4732	POS
WWTP_04_201030	28.4996	POS
WWTP_06_201130	28.521	POS
WWTP_06_201127	28.5296	POS
WWTP_12_201127	28.5617	POS
WWTP_06_201202	28.5632	POS
WWTP_05_201122	28.5658	POS
WWTP_06_201216	28.572	POS
WWTP_12_201204	28.5722	POS
WWTP_02_201126	28.5992	POS
WWTP_05_201126	28.6214	POS
WWTP_09_201126	28.6416	POS
WWTP_03_201118	28.6531	POS
WWTP_06_201023	28.6568	POS
WWTP_07_201030	28.6592	POS
WWTP_12_201116	28.6671	POS
WWTP_08_201130	28.6778	POS
WWTP_01_201202	28.7512	POS
WWTP_04_201125	28.7867	POS
WWTP_08_201116	28.8206	POS
WWTP_04_201102	28.8307	POS
WWTP_02_201124	28.8466	POS
WWTP_02_201210	28.8698	POS
WWTP_04_201202	28.8767	POS
WWTP_11_201119	28.8783	POS
WWTP_06_201209	28.8928	POS
WWTP_05_201129	28.9107	POS
WWTP_06_201028	28.9266	POS
WWTP_08_201118	28.9369	POS
WWTP_01_201120	28.9568	POS
WWTP_08_201207	28.9631	POS
WWTP_05_201117	28.9805	POS
WWTP_01_201123	29.0203	POS
WWTP_04_201211	29.0287	POS
WWTP_06_201120	29.0305	POS
WWTP_04_201209	29.1223	POS
WWTP_08_201120	29.1285	POS
WWTP_01_201118	29.1709	POS
WWTP_06_201123	29.1821	POS
WWTP_03_201120	29.1972	POS
WWTP_10_201130	29.2038	POS
WWTP_12_201118	29.2467	POS
WWTP_03_201116	29.3133	POS
WWTP_03_201123	29.359	POS
WWTP_12_201120	29.3915	POS
WWTP_05_201119	29.4	POS
WWTP_05_201115	29.422	POS
WWTP_06_201118	29.4267	POS
WWTP_02_201018	29.5614	POS
WWTP_10_201211	29.7235	POS
WWTP_10_201116	29.8878	POS
WWTP_11_201110	29.9746	POS
WWTP_02_201201	29.9759	POS
WWTP_08_201202	30.2096	POS
WWTP_04_201204	30.4377	POS
WWTP_04_201028	30.457	POS
WWTP_04_201106	30.7945	POS
WWTP_03_201125	31.2223	POS
WWTP_04_201130	31.3824	POS
WWTP_05_201201	31.5772	POS
WWTP_11_201115	32.145	POS
WWTP_04_201104	32.261	POS
WWTP_11_201201	32.3895	POS
WWTP_10_201202	32.7927	POS
WWTP_06_201125	33.21	POS
WWTP_07_201026	33.42	POS
WWTP_09_201029	34.2974	delayed or neg
WWTP_02_201027	35.1194	delayed or neg
WWTP_08_201030	35.4276	delayed or neg
WWTP_04_201214	36.2125	delayed or neg
WWTP_08_201028	37.4944	delayed or neg
WWTP_02_201029	40.7454	delayed or neg
WWTP_02_201020	Negative	delayed or neg
WWTP_02_201022	Negative	delayed or neg
WWTP_02_201025	Negative	delayed or neg
WWTP_04_201026	Negative	delayed or neg
WWTP_06_201104	Negative	delayed or neg
WWTP_03_201204	Negative	delayed or neg
WWTP_04_201207	Negative	delayed or neg
WWTP_04_201216	Negative	delayed or neg
WWTP_05_201208	Negative	delayed or neg
WWTP_10_201109	Negative	delayed or neg
WWTP_10_201118	Negative	delayed or neg
WWTP_10_201120	Negative	delayed or neg
WWTP_10_201125	Negative	delayed or neg
WWTP_10_201204	Negative	delayed or neg
WWTP_10_201207	Negative	delayed or neg
WWTP_10_201209	Negative	delayed or neg
WWTP_11_201112	Negative	delayed or neg

## Sheet: 100mg_20mL
WWTP	Sample_Code	CollectionDate	pH_adjusted	Matrix	weight_solids_RNAext_mg	E_rep1	E_rep2	E_avgCt	E _avgCopiesperRxn	N2_rep1	N2_rep2	N2_avgCt	N2_avgCopiesperRxn	229E	229E_interpretation	229E_copiesperRxn	Recovery_rate_229E	Salmon	Salmon_interpretation	solidsYield_mg	DilutionFactor_SampleType	Ecopiesper100mLWW	logEcopiesper100mLWW	N2copiesper100mLWW	logN2copiesper100mLWWW	EandN2_interpretation
WWTP_01	WWTP_01_201209	2020-12-09	yes	ultrafiltration		Negative	42.2637	42.2637	0.0646645	Negative	Negative	-		32.698	POS	108.271	0.0233049	27.5738	POS		50	0	0	0	0	NEG
WWTP_01	WWTP_01_201123	2020-11-23	no	20mL solids 1:10	99.5	Negative	40.0166	40.0166	0.244094	34.2835	Negative	34.2835	2.42334	no data		no data	no data	33.4516	POS	99.5	1000	244.094	2.38756	2423.34	3.38441	POS
WWTP_12	WWTP_12_201109	2020-11-09	yes	ultrafiltration		Negative	39.9045	39.9045	0.420358	Negative	Negative	-		27.6821	POS	347.446	0.0576594	27.188	POS		50	0	0	0	0	NEG
WWTP_11	WWTP_11_201119	2020-11-19	no	100mg solidsin100uL 1:10	107.7	38.4706	Negative	38.4706	0.741671	Negative	35.1532	35.1532	1.27347	no data		no data	no data	32.5742	POS	525.9	2	780.089	2.89214	1339.43	3.12692	POS
WWTP_07	WWTP_07_201202	2020-12-02	yes	ultrafiltration		Negative	39.067	39.067	0.794107	Negative	35.087	35.087	1.69114	27.8279	POS	328.219	0.0392772	28.0822	POS		50	39.7054	1.59885	84.5569	1.92715	POS
WWTP_03	WWTP_03_201209	2020-12-09	no	20mL solids	123.7	38.0966	Negative	38.0966	1.36743	35.8796	36.0005	35.9401	0.975103	29.6228	POS	124.722	0.406469	28.6748	POS	123.7	100	136.743	2.1359	101.615	2.00696	POS
WWTP_10	WWTP_10_201120	2020-11-20	yes	ultrafiltration 1:10		Negative	37.5097	37.5097	1.47988	Negative	Negative	-		29.6235	POS	60.5061	-	32.053	POS		500	739.938	2.8692	0	0	POS
WWTP_12	WWTP_12_201211	2020-12-11	no	20mL solids	78.6	37.4641	38.0196	37.7419	1.54897	Negative	Negative	-		33.1564	POS	78.7727	-	27.4025	POS	78.6	100	184.568	2.26616	0	0	POS
WWTP_08	WWTP_08_201211	2020-12-11	no	20mL solids	51.5	37.4465	37.5422	37.4943	1.80815	Negative	Negative	-		32.298	POS	142.893	-	27.3071	POS	51.5	100	186.859	2.27151	0	0	POS
WWTP_09	WWTP_09_201124	2020-11-24	no	100mg solidsin100uL	103.3	36.9479	37.3881	37.168	1.84177	35.2652	36.9416	36.1034	1.21933	no data		no data	no data	27.7564	POS	939.4	0.2	398.994	2.60097	347.187	2.54056	POS
WWTP_01	WWTP_01_201209	2020-12-09	no	20mL solids	47.4	37.4137	Negative	37.4137	1.91179	Negative	Negative	-		33.9141	POS	46.5676	-	27.6291	POS	47.4	100	0	0	0	0	NEG
WWTP_10	WWTP_10_201209	2020-12-09	no	20mL solids	84.7	37.4094	Negative	37.4094	1.91759	Negative	Negative	-		33.7051	POS	53.833	-	28.2106	POS	84.7	100	0	0	0	0	NEG
WWTP_11	WWTP_11_201126	2020-11-26	yes	ultrafiltration		37.1026	37.0748	37.0887	1.92422	33.5181	35.3186	34.4184	3.92363	27.0346	POS	381.607	0.0747009	28.4732	POS		50	97.1463	1.98743	303.269	2.48183	POS
WWTP_02	WWTP_02_201122	2020-11-22	no	100mg solidsin100uL	92.7	37.1383	37.0311	37.0847	1.93087	Negative	35.3689	35.3689	1.72204	no data		no data	no data	28.5795	POS	536.7	0.2	215.038	2.33252	184.844	2.2668	POS
WWTP_06	WWTP_06_201214	2020-12-14	yes	ultrafiltration		37.245	37.4781	37.3615	1.98935	Negative	Negative	-		32.9395	POS	91.5629	0.0197086	27.6865	POS		50	107.544	2.03159	0	0	POS
WWTP_05	WWTP_05_201206	2020-12-06	no	20mL solids 1:5	87.5	37.1944	no data	37.1944	1.99475	34.7122	no data	34.7122	1.74189	28.1061	POS	271.971	-	Negative	delayed or neg	87.5	500	997.374	2.99886	870.945	2.93999	POS
WWTP_02	WWTP_02_201126	2020-11-26	no	100mg solidsin100uL	97.6	36.9924	Negative	36.9924	2.05841	Negative	34.4593	34.4593	3.19714	no data		no data	no data	28.9522	POS	428.9	0.2	176.57	2.24692	274.251	2.43815	POS
WWTP_05	WWTP_05_201122	2020-11-22	yes	ultrafiltration		Negative	36.9602	36.9602	2.10544	34.373	35.433	34.903	2.51952	27.2912	POS	317.952	0.0622403	28.5658	POS		50	105.272	2.02231	169.528	2.22924	POS
WWTP_09	WWTP_09_201122	2020-11-22	no	100mg solidsin100uL	96.5	36.9552	Negative	36.9552	2.11287	Negative	Negative	-		no data		no data	no data	27.9494	POS	881.7	0.2	372.584	2.57122	0	0	POS
WWTP_12	WWTP_12_201125	2020-11-25	yes	ultrafiltration		38.0429	Negative	38.0429	2.20897	34.0838	33.3219	33.7029	4.55058	26.6622	POS	932.939	0.111223	28.0949	POS		50	110.448	2.04316	289.261	2.46129	POS
WWTP_07	WWTP_07_201123	2020-11-23	no	20mL solids	69.6	36.8879	Negative	36.8879	2.21492	35.2551	Negative	35.2551	1.86063	no data		no data	no data	29.0145	POS	69.6	100	221.492	2.34536	186.063	2.26966	POS
WWTP_11	WWTP_11_201122	2020-11-22	yes	ultrafiltration		Negative	36.8269	36.8269	2.31162	35.0932	Negative	35.0932	2.07727	28.0278	POS	188.268	0.0368541	28.2981	POS		50	115.581	2.06289	103.864	2.01646	POS
WWTP_11	WWTP_11_201206	2020-12-06	no	20mL solids	74.4	36.9814	Negative	36.9814	2.31213	31.1893	35.036	33.1126	11.0354	28.0556	POS	353.835	1.15314	27.7066	POS	74.4	100	231.213	2.36401	2068.32	3.31562	POS
WWTP_02	WWTP_02_201122	2020-11-22	yes	ultrafiltration		36.7921	Negative	36.7921	2.36872	34.9623	Negative	34.9623	2.27066	27.663	POS	244.048	0.0477734	28.4306	POS		50	118.436	2.07348	113.533	2.05512	POS
WWTP_02	WWTP_02_201210	2020-12-10	no	20mL solids 1:5	66.8	36.9241	no data	36.9241	2.40584	34.8463	no data	34.8463	1.5853	no data		no data	no data	no data		66.8	500	1202.92	3.08024	792.652	2.89908	POS
WWTP_12	WWTP_12_201207	2020-12-07	yes	ultrafiltration		37.1144	37.055	37.0847	2.40604	34.1703	35.5723	34.8713	2.43627	31.9809	POS	178.063	0.0383274	27.6358	POS		50	122.797	2.08919	177.569	2.24937	POS
WWTP_01	WWTP_01_201211	2020-12-11	yes	ultrafiltration		37.0791	Negative	37.0791	2.41495	Negative	Negative	-		33.0551	POS	84.5062	0.0181897	27.7353	POS		50	0	0	0	0	NEG
WWTP_12	WWTP_12_201130	2020-11-30	yes	ultrafiltration		Negative	37.4417	37.4417	2.43799	35.4234	Negative	35.4234	1.32645	27.3251	POS	470.36	0.057351	28.3608	POS		50	121.9	2.086	66.3227	1.82166	POS
WWTP_05	WWTP_05_201208	2020-12-08	no	20mL solids	109.6	36.8733	36.9341	36.9037	2.44066	33.9193	Negative	33.9193	3.04009	28.6489	POS	238.435	0.777057	28.0016	POS	109.6	100	249.211	2.39657	304.009	2.48289	POS
WWTP_03	WWTP_03_201204	2020-12-04	yes	ultrafiltration		37.2419	Negative	37.2419	2.45774	34.4721	Negative	34.4721	2.70944	26.221	POS	1199.39	0.137626	Negative	delayed or neg		50	122.887	2.08951	135.472	2.13185	POS
WWTP_11	WWTP_11_201210	2020-12-10	no	20mL solids	56.9	Negative	36.873	36.873	2.49255	33.5628	34.5589	34.0609	2.92241	28.5592	POS	253.096	0.824839	27.7883	POS	56.9	100	249.255	2.39664	390.498	2.59162	POS
WWTP_03	WWTP_03_201118	2020-11-18	no	20mL solids	25.8	Negative	37.1885	37.1885	2.52116	35.5128	Negative	35.5128	1.48904	no data		no data	no data	29.9641	POS	25.8	100	252.116	2.4016	148.904	2.17291	POS
WWTP_06	WWTP_06_201123	2020-11-23	yes	ultrafiltration		37.7965	Negative	37.7965	2.61807	34.7607	Negative	34.7607	3.31804	30.537	POS	35.2541	0.0037581	29.1821	POS		50	130.903	2.11695	165.902	2.21985	POS
WWTP_01	WWTP_01_201207	2020-12-07	no	20mL solids	32.1	37.4411	Negative	37.4411	2.64414	Negative	34.167	34.167	3.63869	28.8635	POS	156.445	-	28.1031	POS	32.1	100	264.414	2.42228	363.869	2.56095	POS
WWTP_09	WWTP_09_201126	2020-11-26	yes	ultrafiltration		37.0426	37.2217	37.1322	2.6974	34.7286	Negative	34.7286	2.37547	28.0042	POS	287.786	0.0596655	28.6416	POS		50	143.055	2.1555	118.774	2.07472	POS
WWTP_02	WWTP_02_201206	2020-12-06	no	20mL solids	76.1	37.2429	36.9778	37.1104	2.70083	33.7035	35.6173	34.6604	2.92423	28.0248	POS	361.162	1.17702	28.1968	POS	76.1	100	294.577	2.4692	462.849	2.66544	POS
WWTP_01	WWTP_01_201120	2020-11-20	yes	ultrafiltration		37.7436	Negative	37.7436	2.71773	33.7383	35.0985	34.4184	4.68514	32.1163	POS	11.3076	0.00120539	28.9568	POS		50	135.886	2.13318	337.276	2.52799	POS
WWTP_12	WWTP_12_201120	2020-11-20	no	100mg solidsin100uL	97.1	Negative	37.7371	37.7371	2.73015	34.226	35.3083	34.7672	3.53888	no data		no data	no data	28.6077	POS	372.5	0.2	203.396	2.30834	358.247	2.55418	POS
WWTP_05	WWTP_05_201119	2020-11-19	yes	ultrafiltration		Negative	37.7352	37.7352	2.73387	35.4654	Negative	35.4654	2.03475	35.7097	POS	0.850622	0.00016775	29.4	POS		50	136.693	2.13575	101.738	2.00748	POS
WWTP_10	WWTP_10_201211	2020-12-11	yes	ultrafiltration		Negative	36.8591	36.8591	2.81591	35.0215	35.3189	35.1702	1.76405	31.4557	POS	256.34	0.0551763	29.7235	POS		50	140.796	2.14859	97.42	1.98865	POS
WWTP_05	WWTP_05_201117	2020-11-17	yes	ultrafiltration		Negative	37.6714	37.6714	2.85967	Negative	35.5569	35.5569	1.90951	32.9	POS	6.43156	0.00126835	28.9805	POS		50	142.983	2.15529	95.4754	1.97989	POS
WWTP_02	WWTP_02_201129	2020-11-29	no	20mL solids	73.4	Negative	37.2062	37.2062	2.86834	Negative	Negative	-		28.7327	POS	171.793	-	28.1982	POS	73.4	100	0	0	0	0	NEG
WWTP_10	WWTP_10_201116	2020-11-16	yes	ultrafiltration		37.6523	Negative	37.6523	2.89848	35.3889	Negative	35.3889	2.14561	30.1021	POS	48.2163	0.00513988	29.8878	POS		50	144.924	2.16114	107.281	2.03052	POS
WWTP_07	WWTP_07_201204	2020-12-04	no	20mL solids	35.7	Negative	37.158	37.158	2.96523	35.3009	Negative	35.3009	1.44909	28.3334	POS	228.602	-	27.6633	POS	35.7	100	296.523	2.47206	144.909	2.1611	POS
WWTP_07	WWTP_07_201208	2020-12-08	yes	ultrafiltration		Negative	36.9557	36.9557	2.99075	Negative	Negative	-		28.5713	POS	251.061	0.0380944	28.3176	POS		50	0	0	0	0	NEG
WWTP_08	WWTP_08_201120	2020-11-20	no	20mL solids	50.3	36.9319	Negative	36.9319	3.01745	Negative	Negative	-		no data		no data	no data	28.6083	POS	50.3	100	0	0	0	0	NEG
WWTP_09	WWTP_09_201208	2020-12-08	yes	ultrafiltration		36.9396	Negative	36.9396	3.02393	35.5179	Negative	35.5179	1.30743	29.0315	POS	184.849	0.0212109	28.2629	POS		50	151.196	2.17954	65.3713	1.81539	POS
WWTP_08	WWTP_08_201123	2020-11-23	yes	ultrafiltration		36.9981	36.9178	36.958	3.03153	Negative	34.6732	34.6732	2.46856	27.9877	POS	291.109	0.0603546	28.0666	POS		50	155.711	2.19232	123.428	2.09141	POS
WWTP_05	WWTP_05_201210	2020-12-10	yes	ultrafiltration		37.0796	36.7867	36.9331	3.05276	33.523	34.3867	33.9549	4.0621	27.8097	POS	416.749	0.0632346	28.3197	POS		50	167.923	2.22511	262.438	2.41903	POS
WWTP_02	WWTP_02_201115	2020-11-15	no	20mL solids	91.6	37.172	36.9246	37.0483	3.05755	34.9429	35.1576	35.0503	1.44711	no data		no data	no data	28.3162	POS	91.6	100	331.187	2.52007	155.752	2.19243	POS
WWTP_06	WWTP_06_201207	2020-12-07	yes	ultrafiltration		Negative	37.0902	37.0902	3.10743	35.3242	Negative	35.3242	1.42497	27.8792	POS	316.407	0.0385795	28.2832	POS		50	155.371	2.19137	71.2484	1.85278	POS
WWTP_11	WWTP_11_201203	2020-12-03	yes	ultrafiltration		37.0623	Negative	37.0623	3.16771	33.7978	34.0436	33.9207	3.94148	26.8276	POS	671.467	0.0803529	27.8784	POS		50	158.385	2.19972	214.52	2.33147	POS
WWTP_11	WWTP_11_201112	2020-11-12	yes	ultrafiltration 1:10		Negative	36.9112	36.9112	3.19135	Negative	Negative	-		31.9086	POS	11.6605	-	32.2485	POS		500	1595.67	3.20294	0	0	POS
WWTP_08	WWTP_08_201209	2020-12-09	yes	ultrafiltration		36.0173	37.9452	36.9812	3.19404	35.004	Negative	35.004	1.97263	32.5856	POS	117.049	0.0269029	27.8723	POS		50	253.448	2.40389	98.6316	1.99402	POS
WWTP_12	WWTP_12_201202	2020-12-02	yes	ultrafiltration		37.0059	Negative	37.0059	3.29348	34.2334	34.4206	34.327	2.93438	26.7412	POS	714.271	0.087091	28.05	POS		50	164.674	2.21663	156.62	2.19485	POS
WWTP_09	WWTP_09_201129	2020-11-29	yes	ultrafiltration		36.8069	Negative	36.8069	3.35763	Negative	Negative	-		28.4821	POS	206.327	0.042777	28.3747	POS		50	0	0	0	0	NEG
WWTP_12	WWTP_12_201118	2020-11-18	no	20mL solids	60.6	36.7773	Negative	36.7773	3.3624	33.3791	33.1763	33.2777	7.16621	no data		no data	no data	28.4068	POS	60.6	100	336.24	2.52665	767.537	2.8851	POS
WWTP_07	WWTP_07_201118	2020-11-18	no	20mL solids	148.4	36.8888	Negative	36.8888	3.3927	35.3725	Negative	35.3725	1.147	no data		no data	no data	28.6572	POS	148.4	100	339.27	2.53054	114.7	2.05956	POS
WWTP_07	WWTP_07_201116	2020-11-16	no	20mL solids	130.3	36.8851	Negative	36.8851	3.40122	33.5735	35.2578	34.4156	2.68763	no data		no data	no data	31.5479	POS	130.3	100	340.122	2.53163	413.057	2.61601	POS
WWTP_12	WWTP_12_201120	2020-11-20	no	20mL solids	200.5	36.732	Negative	36.732	3.47053	Negative	Negative	-		no data		no data	no data	28.8684	POS	200.5	100	0	0	0	0	NEG
WWTP_01	WWTP_01_201214	2020-12-14	no	20mL solids	33.6	Negative	36.5533	36.5533	3.48628	Negative	Negative	-		32.4769	POS	126.217	-	26.9904	POS	33.6	100	0	0	0	0	NEG
WWTP_07	WWTP_07_201120	2020-11-20	no	20mL solids	112.1	36.8461	Negative	36.8461	3.49187	34.2869	Negative	34.2869	2.48515	no data		no data	no data	27.9938	POS	112.1	100	349.187	2.54306	248.515	2.39535	POS
WWTP_11	WWTP_11_201117	2020-11-17	no	20mL solids	135.4	36.7786	36.8933	36.8359	3.5184	32.5611	33.5978	33.0795	6.27695	no data		no data	no data	28.5192	POS	135.4	100	365.443	2.56282	849.427	2.92913	POS
WWTP_09	WWTP_09_201208	2020-12-08	no	20mL solids	277.3	36.7638	36.6682	36.716	3.52717	35.0675	Negative	35.0675	1.78934	28.7523	POS	222.575	0.725371	28.1392	POS	277.3	100	364.285	2.56144	178.934	2.25269	POS
WWTP_10	WWTP_10_201130	2020-11-30	no	20mL solids	94.9	Negative	37.002	37.002	3.57016	Negative	35.592	35.592	1.34218	28.5014	POS	202.714	-	28.0856	POS	94.9	100	357.016	2.55269	134.218	2.12781	POS
WWTP_12	WWTP_12_201207	2020-12-07	no	20mL solids	67.1	Negative	36.5074	36.5074	3.59973	Negative	35.583	35.583	1.31121	32.6337	POS	113.21	-	27.4339	POS	67.1	100	359.973	2.55627	131.121	2.11767	POS
WWTP_12	WWTP_12_201211	2020-12-11	yes	ultrafiltration		37.0732	36.0639	36.5685	3.66583	31.7647	34.1764	32.9706	11.4558	32.6715	POS	110.276	0.0237366	27.9594	POS		50	245.333	2.38976	968.776	2.98622	POS
WWTP_06	WWTP_06_201130	2020-11-30	yes	ultrafiltration		Negative	37.2952	37.2952	3.69058	35.3576	Negative	35.3576	1.30777	28.9348	POS	188.3	0.0224487	28.521	POS		50	184.529	2.26607	65.3883	1.8155	POS
WWTP_08	WWTP_08_201204	2020-12-04	no	20mL solids	96.5	Negative	36.9498	36.9498	3.69996	Negative	35.4949	35.4949	1.43661	28.4367	POS	212.327	-	27.548	POS	96.5	100	369.996	2.5682	143.661	2.15734	POS
WWTP_04	WWTP_04_201123	2020-11-23	yes	ultrafiltration		37.0332	35.5731	36.3031	3.78326	Negative	33.6576	33.6576	5.51628	27.696	POS	238.387	0.0453215	28.3674	POS		50	278.308	2.44453	275.814	2.44062	POS
WWTP_07	WWTP_07_201130	2020-11-30	yes	ultrafiltration		Negative	36.8035	36.8035	3.78712	Negative	Negative	-		26.9585	POS	611.432	0.0731687	27.8373	POS		50	0	0	0	0	NEG
WWTP_08	WWTP_08_201130	2020-11-30	no	20mL solids	192.7	36.9145	Negative	36.9145	3.79031	35.5357	Negative	35.5357	1.39612	28.7112	POS	174.455	-	27.9889	POS	192.7	100	379.031	2.57867	139.612	2.14492	POS
WWTP_05	WWTP_05_201117	2020-11-17	no	20mL solids	131.7	36.6002	Negative	36.6002	3.80614	34.9299	33.8105	34.3702	3.57984	no data		no data	no data	29.1271	POS	131.7	100	380.614	2.58049	491.788	2.69178	POS
WWTP_10	WWTP_10_201207	2020-12-07	no	20mL solids	82.5	Negative	36.4252	36.4252	3.81256	Negative	Negative	-		32.9679	POS	89.7784	-	27.6116	POS	82.5	100	0	0	0	0	NEG
WWTP_11	WWTP_11_201208	2020-12-08	no	20mL solids	79.9	37.2378	35.6811	36.4595	3.81542	Negative	34.7081	34.7081	1.74685	28.8148	POS	213.513	0.695838	28.3564	POS	79.9	100	569.522	2.75551	174.685	2.24226	POS
WWTP_05	WWTP_05_201203	2020-12-03		20mL solids	75.5	Negative	36.8949	36.8949	3.84142	35.7864	Negative	35.7864	1.17145	28.4881	POS	204.65	-	27.6789	POS	75.5	100	384.142	2.58449	117.145	2.06872	POS
WWTP_03	WWTP_03_201202	2020-12-02	yes	ultrafiltration		36.5885	Negative	36.5885	3.84741	Negative	Negative	-		27.4877	POS	516.31	0.0592452	28.015	POS		50	0	0	0	0	NEG
WWTP_06	WWTP_06_201120	2020-11-20	no	100mg solidsin100uL	100.1	36.9079	37.6765	37.2922	3.87545	35.7236	34.3622	35.0429	3.03798	no data		no data	no data	29.3963	POS	609.2	0.2	597.191	2.77611	533.042	2.72676	POS
WWTP_02	WWTP_02_201210	2020-12-10	yes	ultrafiltration		36.2736	36.9626	36.6181	3.87575	33.8051	34.5787	34.1919	3.41375	27.4346	POS	534.869	0.0811575	28.8698	POS		50	238.746	2.37794	215.604	2.33366	POS
WWTP_09	WWTP_09_201203	2020-12-03	no	20mL solids	141.9	36.2234	37.0425	36.6329	3.88016	Negative	Negative	-		28.641	POS	239.694	0.781159	27.6276	POS	141.9	100	494.24	2.69394	0	0	POS
WWTP_11	WWTP_11_201129	2020-11-29	no	20mL solids	48.5	36.851	36.8778	36.8644	3.92241	Negative	Negative	-		28.3559	POS	224.96	-	27.9567	POS	48.5	100	395.833	2.59751	0	0	POS
WWTP_07	WWTP_07_201207	2020-12-07	no	20mL solids	46.2	Negative	36.5516	36.5516	3.94608	Negative	Negative	-		28.5619	POS	252.645	0.823368	27.8457	POS	46.2	100	0	0	0	0	NEG
WWTP_07	WWTP_07_201208	2020-12-08	no	20mL solids	40.8	Negative	36.5373	36.5373	3.9849	Negative	Negative	-		28.6709	POS	234.972	0.765772	27.7548	POS	40.8	100	0	0	0	0	NEG
WWTP_12	WWTP_12_201127	2020-11-27	no	20mL solids	107.9	37.1481	Negative	37.1481	4.0827	35.2594	Negative	35.2594	1.40501	no data		no data	no data	27.7569	POS	107.9	100	408.27	2.61095	140.501	2.14768	POS
WWTP_06	WWTP_06_201123	2020-11-23	no	100mg solidsin100uL	97.6	36.774	37.671	37.2225	4.12385	33.7665	32.7366	33.2515	10.0662	no data		no data	no data	29.6068	POS	647.5	0.2	697.627	2.84362	1750.52	3.24317	POS
WWTP_03	WWTP_03_201130	2020-11-30	yes	ultrafiltration		37.1308	Negative	37.1308	4.13135	Negative	Negative	-		27.4366	POS	540.783	0.0511108	28.4653	POS		50	206.567	2.31506	0	0	POS
WWTP_03	WWTP_03_201130	2020-11-30	no	100mg solidsin100uL	105.6	Negative	37.1283	37.1283	4.13867	Negative	Negative	-		no data		no data	no data	28.3228	POS	274.6	0.2	0	0	0	0	NEG
WWTP_08	WWTP_08_201123	2020-11-23	no	20mL solids	162.5	36.1009	36.991	36.5459	4.19271	33.9756	Negative	33.9756	4.00751	no data		no data	no data	28.4892	POS	162.5	100	542.222	2.73418	400.751	2.60287	POS
WWTP_11	WWTP_11_201203	2020-12-03	no	20mL solids	51.9	36.7591	Negative	36.7591	4.21507	Negative	Negative	-		28.7202	POS	173.334	-	28.1186	POS	51.9	100	0	0	0	0	NEG
WWTP_02	WWTP_02_201119	2020-11-19	no	20mL solids	148.4	Negative	36.5611	36.5611	4.23134	33.9296	34.3249	34.1272	2.81208	no data		no data	no data	28.2611	POS	148.4	100	423.134	2.62648	320.536	2.50588	POS
WWTP_05	WWTP_05_201124	2020-11-24	yes	ultrafiltration		Negative	35.9505	35.9505	4.27223	33.5673	Negative	33.5673	5.86559	26.8142	POS	446.398	0.087384	27.7035	POS		50	213.612	2.32962	293.28	2.46728	POS
WWTP_12	WWTP_12_201204	2020-12-04	yes	ultrafiltration		37.006	36.3251	36.6656	4.28093	33.2627	32.8751	33.0689	7.33352	27.1141	POS	547.011	0.066697	28.5722	POS		50	263.432	2.42067	417.655	2.62082	POS
WWTP_12	WWTP_12_201118	2020-11-18	yes	ultrafiltration		36.7487	37.5626	37.1557	4.28603	36.6594	Negative	36.6594	0.888565	29.8647	POS	57.2057	0.00609815	29.2467	POS		50	274.205	2.43808	44.4283	1.64766	POS
WWTP_06	WWTP_06_201214	2020-12-14	no	20mL solids	65.8	36.6055	35.8918	36.2487	4.44725	32.8842	32.2168	32.5505	11.4413	33.6293	POS	56.7423	-	27.2644	POS	65.8	100	553.301	2.74296	1408.54	3.14877	POS
WWTP_02	WWTP_02_201203	2020-12-03	no	20mL solids	95	36.9934	36.2422	36.6178	4.45056	33.747	33.9206	33.8338	4.18832	28.6914	POS	176.944	-	28.3941	POS	95	100	557.912	2.74657	445.057	2.64842	POS
WWTP_10	WWTP_10_201125	2020-11-25	no	100mg solidsin100uL 1:10	104	37.0159	Negative	37.0159	4.47066	Negative	35.3274	35.3274	1.33689	Negative	NEG		-	32.0214	POS	828.7	2	7409.68	3.8698	2215.76	3.34552	POS
WWTP_10	WWTP_10_201127	2020-11-27	no	100mg solidsin100uL	96.3	Negative	36.9992	36.9992	4.52219	35.081	Negative	35.081	1.60056	no data		no data	no data	27.6991	POS	478.1	0.2	432.411	2.6359	153.046	2.18482	POS
WWTP_06	WWTP_06_201216	2020-12-16	no	20mL solids	94.3	35.9043	36.4982	36.2013	4.55396	35.5292	33.2256	34.3774	4.13839	33.352	POS	68.7781	-	28.7735	POS	94.3	100	548.493	2.73917	691.482	2.83978	POS
WWTP_02	WWTP_02_201126	2020-11-26	yes	ultrafiltration		35.9547	35.7655	35.8601	4.56187	33.6521	32.379	33.0156	9.35018	27.2668	POS	323.509	0.063328	28.5992	POS		50	243.2	2.38596	658.189	2.81835	POS
WWTP_11	WWTP_11_201129	2020-11-29	yes	ultrafiltration		37.078	36.1268	36.6024	4.58748	34.2711	33.7915	34.0313	3.67907	27.3904	POS	448.865	0.0537146	28.0124	POS		50	302.068	2.4801	215.49	2.33343	POS
WWTP_11	WWTP_11_201122	2020-11-22	no	100mg solidsin100uL	98.3	35.8294	Negative	35.8294	4.65095	35.5392	35.5584	35.5488	1.52364	no data		no data	no data	28.1671	POS	477.3	0.2	443.98	2.64736	146.395	2.16553	POS
WWTP_11	WWTP_11_201117	2020-11-17	no	100mg solidsin100uL	96.3	Negative	37.1371	37.1371	4.70521	33.4231	34.5975	34.0103	4.85026	no data		no data	no data	28.2403	POS	563.8	0.2	530.56	2.72473	752.985	2.87679	POS
WWTP_02	WWTP_02_201117	2020-11-17	no	100mg solidsin100uL	101.6	Negative	37.1319	37.1319	4.72135	33.884	33.7445	33.8142	5.13411	no data		no data	no data	28.7142	POS	516.9	0.2	488.094	2.6885	555.735	2.74487	POS
WWTP_10	WWTP_10_201123	2020-11-23	no	20mL solids	155.6	Negative	36.9353	36.9353	4.72489	Negative	Negative	-		no data		no data	no data	30.0375	POS	155.6	100	0	0	0	0	NEG
WWTP_09	WWTP_09_201112	2020-11-12	no	100mg solidsin100uL	100.6	Negative	37.1256	37.1256	4.74066	Negative	Negative	-		no data		no data	no data	28.1391	POS	460.2	0.2	0	0	0	0	NEG
WWTP_11	WWTP_11_201117	2020-11-17	yes	ultrafiltration		37.108	Negative	37.108	4.79525	Negative	Negative	-		32.4694	POS	8.76565	0.00150553	26.9552	POS		50	239.762	2.37978	0	0	POS
WWTP_04	WWTP_04_201130	2020-11-30	yes	ultrafiltration		35.9919	36.6226	36.3072	4.82182	33.0616	33.3693	33.2154	6.83352	27.4961	POS	409.935	0.0816652	31.3824	POS		50	291.93	2.46528	378.048	2.57755	POS
WWTP_01	WWTP_01_201113	2020-11-13	no	100mg solidsin100uL	107.4	37.1498	35.8212	36.4855	4.85265	34.1185	34.1689	34.1437	4.72161	no data		no data	no data	28.4318	POS	660.2	0.2	914.1	2.96099	634.028	2.80211	POS
WWTP_11	WWTP_11_201119	2020-11-19	yes	ultrafiltration		36.9189	Negative	36.9189	4.86365	Negative	Negative	-		28.1347	POS	174.487	0.0344102	28.8783	POS		50	0	0	0	0	NEG
WWTP_10	WWTP_10_201125	2020-11-25	yes	ultrafiltration		Negative	36.8903	36.8903	4.87293	35.281	35.2081	35.2446	1.42079	26.9288	POS	773.246	0.0921848	Negative	delayed or neg		50	243.646	2.38676	72.9299	1.86291	POS
WWTP_02	WWTP_02_201208	2020-12-08	yes	ultrafiltration		35.7776	36.8837	36.3307	4.92618	33.0996	34.6723	33.886	4.70327	28.6599	POS	236.696	0.0359147	28.3704	POS		50	335.514	2.52571	352.5	2.54716	POS
WWTP_06	WWTP_06_201120	2020-11-20	yes	ultrafiltration		37.7902	36.3536	37.0719	4.93878	33.838	33.3655	33.6018	7.5156	29.397	POS	80.1107	0.00853983	29.0305	POS		50	362.393	2.55918	436.834	2.64032	POS
WWTP_07	WWTP_07_201116	2020-11-16	no	100mg solidsin100uL	100.4	37.0267	Negative	37.0267	5.05646	35.342	34.259	34.8005	2.81366	no data		no data	no data	26.8933	POS	421.7	0.2	426.462	2.62988	320.37	2.50565	POS
WWTP_04	WWTP_04_201211	2020-12-11	no	20mL solids	179.7	37.4207	35.5298	36.4752	5.06387	35.1126	33.3221	34.2173	3.88583	28.5086	POS	261.769	0.853103	27.93	POS	179.7	100	795.376	2.90057	603.76	2.78086	POS
WWTP_05	WWTP_05_201201	2020-12-01		20mL solids	83.8	35.7787	37.3724	36.5756	5.11963	32.5227	33.8877	33.2052	7.397	28.5363	POS	197.716	-	28.1483	POS	83.8	100	768.191	2.88547	1077.35	3.03236	POS
WWTP_02	WWTP_02_201115	2020-11-15	yes	ultrafiltration		37.0076	Negative	37.0076	5.1197	Negative	35.4316	35.4316	1.72151	28.1978	POS	189.818	0.032602	26.851	POS		50	255.985	2.40821	86.0757	1.93488	POS
WWTP_10	WWTP_10_201202	2020-12-02	no	20mL solids	141.5	36.0174	37.1287	36.573	5.13678	Negative	Negative	-		29.6476	POS	89.2702	-	Negative	delayed or neg	141.5	100	699.964	2.84508	0	0	POS
WWTP_01	WWTP_01_201123	2020-11-23	no	100mg solidsin100uL	95.2	37.7927	36.2765	37.0346	5.13926	33.0479	33.3065	33.1772	9.99631	no data		no data	no data	28.8671	POS	301.1	0.2	460.884	2.66359	655.837	2.8168	POS
WWTP_07	WWTP_07_201120	2020-11-20	no	100mg solidsin100uL	98.4	Negative	36.9789	36.9789	5.21635	33.7754	Negative	33.7754	5.26452	no data		no data	no data	28.504	POS	401.1	0.2	418.456	2.62165	422.319	2.62564	POS
WWTP_04	WWTP_04_201118	2020-11-18	no	20mL solids	95.4	36.7687	35.8463	36.3075	5.26454	32.2413	33.1666	32.704	8.09297	no data		no data	no data	28.3345	POS	95.4	100	685.037	2.83571	1066.71	3.02805	POS
WWTP_01	WWTP_01_201204	2020-12-04	no	20mL solids	46.9	36.9832	36.0239	36.5035	5.29247	Negative	35.1592	35.1592	1.81702	28.8671	POS	156.041	-	27.6702	POS	46.9	100	696.867	2.84315	181.702	2.25936	POS
WWTP_01	WWTP_01_201204	2020-12-04	yes	ultrafiltration		36.4412	36.2027	36.3219	5.29811	Negative	35.2903	35.2903	1.46022	26.9684	POS	607.089	0.0740223	28.0527	POS		50	286.666	2.45738	73.0109	1.86339	POS
WWTP_07	WWTP_07_201118	2020-11-18	no	100mg solidsin100uL	96.1	36.9377	Negative	36.9377	5.35844	Negative	Negative	-		no data		no data	no data	28.2336	POS	422.1	0.2	0	0	0	0	NEG
WWTP_02	WWTP_02_201108	2020-11-08	yes	ultrafiltration		Negative	37.1572	37.1572	5.37524	Negative	Negative	-		30.4256	POS	63.7714	0.00781203	28.3875	POS		50	0	0	0	0	NEG
WWTP_02	WWTP_02_201108	2020-11-08	no	100mg solidsin100uL	103	Negative	37.1508	37.1508	5.3989	36.2326	Negative	36.2326	1.20782	Negative	NEG		-	29.3687	POS	324	0.2	349.849	2.54388	78.2665	1.89358	POS
WWTP_05	WWTP_05_201126	2020-11-26	no	100mg solidsin100uL	98.5	35.6182	35.5748	35.5965	5.47606	34.9519	31.8547	33.4033	10.5465	no data		no data	no data	28.7394	POS	532.3	0.2	591.843	2.77221	2002.1	3.30149	POS
WWTP_02	WWTP_02_201124	2020-11-24	no	100mg solidsin100uL	92.1	35.5754	Negative	35.5754	5.55697	33.6684	35.29	34.4792	3.64628	no data		no data	no data	29.8584	POS	489.4	0.2	543.916	2.73553	535.949	2.72912	POS
WWTP_05	WWTP_05_201119	2020-11-19	no	100mg solidsin100uL	92.5	36.7375	36.6952	36.7163	5.61157	33.3325	35.4212	34.3769	5.51855	no data		no data	no data	29.1558	POS	633.9	0.2	722.069	2.85858	1133.28	3.05434	POS
WWTP_01	WWTP_01_201207	2020-12-07	yes	ultrafiltration		Negative	36.2136	36.2136	5.69035	Negative	34.1795	34.1795	3.25683	27.472	POS	423.426	0.0516283	28.2359	POS		50	284.517	2.45411	162.841	2.21176	POS
WWTP_10	WWTP_10_201113	2020-11-13	yes	ultrafiltration		Negative	37.0515	37.0515	5.77854	Negative	35.7186	35.7186	1.73426	27.6777	POS	505.293	0.0693843	28.344	POS		50	288.927	2.46079	86.7132	1.93809	POS
WWTP_02	WWTP_02_201112	2020-11-12	no	100mg solidsin100uL	105.4	Negative	37.0503	37.0503	5.78308	33.9847	35.1439	34.5643	4.23725	Negative	NEG		-	30.844	POS	412.9	0.2	477.567	2.67903	485.219	2.68594	POS
WWTP_12	WWTP_12_201127	2020-11-27	no	100mg solidsin100uL	110.2	36.2681	37.0882	36.6781	5.86195	33.3787	35.3524	34.3655	3.4314	no data		no data	no data	28.2078	POS	433.2	0.2	647.18	2.81103	480.856	2.68202	POS
WWTP_05	WWTP_05_201110	2020-11-10	yes	ultrafiltration		Negative	37.0255	37.0255	5.88222	Negative	36.1977	36.1977	1.23784	29.7064	POS	109.624	0.0134289	26.9872	POS		50	294.111	2.46851	61.8922	1.79164	POS
WWTP_08	WWTP_08_201127	2020-11-27	no	20mL solids	20.9	Negative	35.9805	35.9805	5.88376	Negative	35.306	35.306	1.59064	no data		no data	no data	28.3111	POS	20.9	100	588.376	2.76966	159.064	2.20157	POS
WWTP_12	WWTP_12_201209	2020-12-09	yes	ultrafiltration		35.1309	37.1144	36.1227	5.88439	Negative	Negative	-		30.5313	POS	486.784	0.104779	27.6893	POS		50	470.633	2.67268	0	0	POS
WWTP_06	WWTP_06_201109	2020-11-09	no	100mg solidsin100uL	102.7	36.9414	37.0943	37.0179	5.92101	35.2847	33.4677	34.3762	5.40396	Negative	NEG		-	30.1921	POS	446.1	0.2	555.882	2.74498	754.3	2.87754	POS
WWTP_12	WWTP_12_201125	2020-11-25	no	100mg solidsin100uL	102.9	36.3003	36.9735	36.6369	5.95435	34.1182	34.8197	34.4689	2.5855	no data		no data	no data	27.8864	POS	533.2	0.2	779.119	2.8916	344.859	2.53764	POS
WWTP_01	WWTP_01_201120	2020-11-20	no	20mL solids	57.2	Negative	35.96	35.96	5.95847	34.4093	Negative	34.4093	3.23055	no data		no data	no data	28.8819	POS	57.2	100	595.847	2.77513	323.055	2.50928	POS
WWTP_03	WWTP_03_201125	2020-11-25	no	20mL solids	97	35.3964	36.8647	36.1306	6.00202	33.5271	35.2402	34.3836	3.90164	no data		no data	no data	30.3599	POS	97	100	884.14	2.94652	600.021	2.77817	POS
WWTP_06	WWTP_06_201109	2020-11-09	yes	ultrafiltration		Negative	36.9893	36.9893	6.0295	35.4496	35.3263	35.3879	2.19069	29.6504	POS	114.35	0.015702	27.7544	POS		50	301.475	2.47925	114.285	2.05799	POS
WWTP_05	WWTP_05_201112	2020-11-12	no	100mg solidsin100uL	93.5	Negative	36.9874	36.9874	6.03731	Negative	33.5928	33.5928	7.74181	Negative	NEG		-	29.6505	POS	592.4	0.2	715.3	2.85449	917.25	2.96249	POS
WWTP_12	WWTP_12_201111	2020-11-11	no	100mg solidsin100uL	104.1	Negative	36.9673	36.9673	6.12099	Negative	Negative	-		Negative	NEG		-	31.3664	POS	369.9	0.2	0	0	0	0	NEG
WWTP_06	WWTP_06_201211	2020-12-11	yes	ultrafiltration		35.1488	36.7935	35.9712	6.12185	33.7287	Negative	33.7287	4.84934	32.1994	POS	153.013	0.0329356	27.9964	POS		50	464.791	2.66726	242.467	2.38465	POS
WWTP_02	WWTP_02_201203	2020-12-03	yes	ultrafiltration		36.8714	35.5594	36.2154	6.27573	33.9665	Negative	33.9665	3.79815	29.4689	POS	101.452	0.0121405	28.47	POS		50	446.877	2.65019	189.908	2.27854	POS
WWTP_04	WWTP_04_201123	2020-11-23	no	20mL solids	122.6	35.3645	35.4143	35.3894	6.33164	Negative	35.2956	35.2956	1.81008	no data		no data	no data	28.1968	POS	122.6	100	644.212	2.80903	181.008	2.2577	POS
WWTP_01	WWTP_01_201127	2020-11-27	yes	ultrafiltration		36.9878	36.1283	36.558	6.38993	33.9453	32.6809	33.3131	6.45445	27.3394	POS	579.092	0.0690381	28.007	POS		50	411.112	2.61396	461.989	2.66463	POS
WWTP_01	WWTP_01_201118	2020-11-18	no	20mL solids	55.1	35.8529	Negative	35.8529	6.42268	35.2389	32.9872	34.113	5.28466	no data		no data	no data	28.5594	POS	55.1	100	642.268	2.80772	876.464	2.94273	POS
WWTP_04	WWTP_04_201120	2020-11-20	no	20mL solids	188.3	35.3731	36.8667	36.1199	6.43396	33.2325	32.393	32.8128	7.42042	no data		no data	no data	28.295	POS	188.3	100	942.441	2.97425	957.504	2.98114	POS
WWTP_11	WWTP_11_201126	2020-11-26	no	100mg solidsin100uL	104.4	36.9638	34.5908	35.7773	6.5901	33.2244	33.1197	33.172	7.68001	no data		no data	no data	27.8992	POS	490.5	0.2	1086.95	3.03621	780.243	2.89223	POS
WWTP_05	WWTP_05_201203	2020-12-03	yes	ultrafiltration		35.352	37.0629	36.2074	6.73946	33.7947	33.0318	33.4133	5.87954	27.2499	POS	496.331	0.0593948	27.6896	POS		50	515.622	2.71233	372.959	2.57166	POS
WWTP_03	WWTP_03_201209	2020-12-09	yes	ultrafiltration		35.7514	Negative	35.7514	6.83197	Negative	Negative	-		27.255	POS	602.768	0.069166	28.0943	POS		50	0	0	0	0	NEG
WWTP_11	WWTP_11_201115	2020-11-15	yes	ultrafiltration		37.1379	36.138	36.638	6.86421	35.4109	33.8786	34.6448	3.32799	27.9731	POS	223.149	0.0383266	32.145	POS		50	451.282	2.65445	245.517	2.39008	POS
WWTP_12	WWTP_12_201202	2020-12-02	no	20mL solids	57.8	Negative	36.0438	36.0438	6.87441	Negative	Negative	-		28.3373	POS	227.968	-	27.4272	POS	57.8	100	0	0	0	0	NEG
WWTP_05	WWTP_05_201119	2020-11-19	no	20mL solids	189.4	36.6097	35.1749	35.8923	7.05266	33.4354	34.5479	33.9917	4.66504	no data		no data	no data	29.4348	POS	189.4	100	1032.45	3.01387	639.914	2.80612	POS
WWTP_11	WWTP_11_201126	2020-11-26	no	20mL solids	131.6	36.0225	34.7117	35.3671	7.12095	33.5851	33.5781	33.5816	5.80881	no data		no data	no data	28.4583	POS	131.6	100	1017.98	3.00774	582.257	2.76511	POS
WWTP_04	WWTP_04_201204	2020-12-04	no	20mL solids	137.7	35.3059	36.2278	35.7669	7.13794	33.1325	32.6205	32.8765	8.73429	no data		no data	no data	28.6077	POS	137.7	100	930.137	2.96855	1027.13	3.01162	POS
WWTP_11	WWTP_11_201208	2020-12-08	yes	ultrafiltration		35.6806	Negative	35.6806	7.17209	32.0391	33.4128	32.726	10.2138	27.4527	POS	528.466	0.0801859	28.3301	POS		50	358.604	2.55462	738	2.86806	POS
WWTP_01	WWTP_01_201202	2020-12-02	no	20mL solids	39.5	35.9636	Negative	35.9636	7.26182	Negative	33.4703	33.4703	5.92552	28.8025	POS	163.431	-	27.7687	POS	39.5	100	726.182	2.86105	592.552	2.77273	POS
WWTP_08	WWTP_08_201125	2020-11-25	no	20mL solids	28.7	Negative	35.657	35.657	7.32889	Negative	35.2289	35.2289	1.67814	no data		no data	no data	27.2575	POS	28.7	100	732.889	2.86504	167.814	2.22483	POS
WWTP_06	WWTP_06_201211	2020-12-11	no	20mL solids	116.6	Negative	35.4723	35.4723	7.41616	33.5171	32.0604	32.7888	10.6789	32.8535	POS	97.1986	-	28.2379	POS	116.6	100	741.616	2.87018	1572.83	3.19668	POS
WWTP_05	WWTP_05_201210	2020-12-10	no	20mL solids	69.5	35.669	35.0008	35.3349	7.43528	33.7923	35.0891	34.4407	2.33021	28.4824	POS	266.369	0.868096	27.9062	POS	69.5	100	912.741	2.96035	332.371	2.52162	POS
WWTP_09	WWTP_09_201117	2020-11-17	no	100mg solidsin100uL	92.5	Negative	36.4202	36.4202	7.50895	Negative	Negative	-		no data		no data	no data	28.056	POS	530.5	0.2	796.7	2.90129	0	0	POS
WWTP_06	WWTP_06_201130	2020-11-30	no	20mL solids	122.3	36.2913	36.2293	36.2603	7.5116	33.3698	34.3294	33.8496	4.17896	no data		no data	no data	27.7217	POS	122.3	100	767.139	2.88487	558.651	2.74714	POS
WWTP_01	WWTP_01_201130	2020-11-30	no	20mL solids	84.5	35.7509	37.0397	36.3953	7.52583	33.233	34.3711	33.8021	4.43079	no data		no data	no data	27.8389	POS	84.5	100	1065.37	3.0275	617.328	2.79052	POS
WWTP_11	WWTP_11_201210	2020-12-10	yes	ultrafiltration		34.9885	36.7139	35.8512	7.52996	35.3655	34.1806	34.7731	2.38666	29.2625	POS	158.512	0.0240515	28.0606	POS		50	576.484	2.76079	165.972	2.22003	POS
WWTP_11	WWTP_11_201124	2020-11-24	no	100mg solidsin100uL	104.4	36.0093	34.5952	35.3023	7.57264	32.4692	33.7963	33.1327	8.69997	no data		no data	no data	28.1213	POS	382.9	0.2	845.858	2.9273	948.092	2.97685	POS
WWTP_12	WWTP_12_201123	2020-11-23	no	100mg solidsin100uL	104.4	36.2205	Negative	36.2205	7.71765	35.5503	35.2449	35.3976	1.27801	no data		no data	no data	28.5844	POS	404	0.2	623.586	2.7949	114.733	2.05969	POS
WWTP_04	WWTP_04_201125	2020-11-25	no	100mg solidsin100uL	95.1	34.9359	35.2955	35.1157	7.73029	32.7922	33.8532	33.3227	7.38368	no data		no data	no data	28.0787	POS	396.6	0.2	690.024	2.83886	788.328	2.89671	POS
WWTP_04	WWTP_04_201214	2020-12-14	yes	ultrafiltration		35.4356	35.3888	35.4122	7.73517	32.0916	34.4903	33.291	9.10965	32.2635	POS	146.358	0.0336393	36.2125	delayed or neg		50	393.082	2.59448	769.275	2.88608	POS
WWTP_06	WWTP_06_201204	2020-12-04	no	20mL solids	50.6	35.2642	36.8845	36.0744	7.79189	34.0167	34.5735	34.2951	3.3901	29.0982	POS	132.267	-	28.0859	POS	50.6	100	1171.5	3.06874	404.239	2.60664	POS
WWTP_05	WWTP_05_201208	2020-12-08	yes	ultrafiltration		35.4573	35.5846	35.521	8.00955	33.1651	34.2299	33.6975	4.9715	25.8098	POS	1576.82	0.239256	Negative	delayed or neg		50	417.943	2.62112	336.779	2.52734	POS
WWTP_11	WWTP_11_201115	2020-11-15	no	20mL solids	162.5	35.4518	35.7942	35.623	8.01643	33.5519	34.0953	33.8236	3.52148	no data		no data	no data	29.0478	POS	162.5	100	893.738	2.95121	419.458	2.62269	POS
WWTP_06	WWTP_06_201204	2020-12-04	yes	ultrafiltration		35.6867	Negative	35.6867	8.18534	33.1637	34.5746	33.8691	4.61512	27.9045	POS	310.73	0.0378873	27.9493	POS		50	409.267	2.61201	339.097	2.53032	POS
WWTP_01	WWTP_01_201118	2020-11-18	yes	ultrafiltration		35.7807	36.7309	36.2558	8.20627	33.5614	Negative	33.5614	7.62628	28.7758	POS	125.298	0.0133568	29.1709	POS		50	542.956	2.73476	381.314	2.58128	POS
WWTP_04	WWTP_04_201207	2020-12-07	no	20mL solids	114.5	35.6944	35.2531	35.4738	8.36006	32.2434	32.5669	32.4051	11.5102	29.163	POS	169.359	0.551941	27.8234	POS	114.5	100	961.576	2.98298	1280.19	3.10727	POS
WWTP_02	WWTP_02_201117	2020-11-17	yes	ultrafiltration		35.6252	37.1275	36.3764	8.67186	34.836	Negative	34.836	2.57332	26.9526	POS	465.218	0.079903	27.3055	POS		50	630.448	2.79965	128.666	2.10946	POS
WWTP_12	WWTP_12_201125	2020-11-25	no	20mL solids	95.7	36.0885	35.9678	36.0282	8.81454	33.6127	34.7471	34.1799	3.36046	no data		no data	no data	27.6781	POS	95.7	100	917.95	2.96282	467.822	2.67008	POS
WWTP_02	WWTP_02_201119	2020-11-19	yes	ultrafiltration		36.2367	36.0852	36.1609	8.90267	32.4174	31.9358	32.1766	15.6929	26.4636	POS	661.516	0.113618	27.9673	POS		50	467.104	2.66941	911.045	2.95954	POS
WWTP_02	WWTP_02_201208	2020-12-08	no	20mL solids	137	34.6309	35.5349	35.0829	9.04916	32.9904	32.1872	32.5888	8.04979	28.5951	POS	247.123	0.80537	28.5743	POS	137	100	1179.56	3.07172	1026.2	3.01123	POS
WWTP_04	WWTP_04_201214	2020-12-14	no	20mL solids	276.7	34.9444	35.4473	35.1959	9.13414	32.9142	32.618	32.7661	9.61352	33.1973	POS	76.5711	-	28.1347	POS	276.7	100	1072.18	3.03027	1061.42	3.02589	POS
WWTP_06	WWTP_06_201123	2020-11-23	no	20mL solids	182.1	35.31	35.3602	35.3351	9.23062	34.3401	32.944	33.642	6.21289	no data		no data	no data	29.6449	POS	182.1	100	939.28	2.9728	903.445	2.9559	POS
WWTP_02	WWTP_02_201110	2020-11-10	no	100mg solidsin100uL	94.5	Negative	36.3591	36.3591	9.2797	33.1436	33.2433	33.1934	10.2606	Negative	NEG		-	29.5978	POS	397.5	0.2	737.736	2.8679	844.332	2.92651	POS
WWTP_06	WWTP_06_201130	2020-11-30	no	100mg solidsin100uL	98.5	37.1594	35.2903	36.2249	9.3332	33.9132	33.723	33.8181	4.03607	no data		no data	no data	28.2029	POS	541.4	0.2	1582.55	3.19936	467.351	2.66964	POS
WWTP_02	WWTP_02_201115	2020-11-15	no	100mg solidsin100uL	104.7	36.0732	Negative	36.0732	9.41516	31.3027	31.9346	31.6187	23.0857	no data		no data	no data	28.263	POS	513.8	0.2	967.501	2.98565	2870.65	3.45798	POS
WWTP_11	WWTP_11_201110	2020-11-10	no	100mg solidsin100uL	107.9	37.0659	35.8414	36.4537	9.47242	33.6597	33.9586	33.8092	6.68509	Negative	NEG		-	30.4049	POS	538.3	0.2	1423.61	3.15339	795.139	2.90044	POS
WWTP_06	WWTP_06_201127	2020-11-27	no	20mL solids	188.3	36.1438	35.703	35.9234	9.57215	33.0028	33.5347	33.2687	6.12828	no data		no data	no data	28.1548	POS	188.3	100	1100.93	3.04176	730.408	2.86357	POS
WWTP_08	WWTP_08_201118	2020-11-18	yes	ultrafiltration		36.1543	35.7873	35.9708	9.57548	32.8842	33.4158	33.15	10.3191	28.4431	POS	159.207	0.0163446	28.9369	POS		50	540.438	2.73275	610.053	2.78537	POS
WWTP_01	WWTP_01_201125	2020-11-25	no	20mL solids	60.3	35.4186	36.6318	36.0252	9.60109	32.7717	34.1328	33.4523	5.9232	no data		no data	no data	28.2748	POS	60.3	100	1338.27	3.12654	864.688	2.93686	POS
WWTP_10	WWTP_10_201120	2020-11-20	no	20mL solids	148.4	35.2728	Negative	35.2728	9.6404	33.9649	Negative	33.9649	4.41302	no data		no data	no data	29.3056	POS	148.4	100	964.04	2.9841	441.302	2.64474	POS
WWTP_01	WWTP_01_201120	2020-11-20	no	100mg solidsin100uL	94.4	35.8055	36.0549	35.9302	9.80988	32.3575	34.3882	33.3728	10.941	no data		no data	no data	29.8813	POS	306.9	0.2	654.989	2.81623	1079.37	3.03317	POS
WWTP_06	WWTP_06_201120	2020-11-20	no	20mL solids	121.1	Negative	35.2264	35.2264	9.95847	35.2818	Negative	35.2818	1.75117	no data		no data	no data	29.093	POS	121.1	100	995.847	2.99819	175.117	2.24333	POS
WWTP_04	WWTP_04_201116	2020-11-16	no	100mg solidsin100uL	104.7	35.3056	37.2068	36.2562	10.0136	34.5728	33.8563	34.2145	4.02919	no data		no data	no data	28.0005	POS	434	0.2	1348.09	3.12972	432.694	2.63618	POS
WWTP_01	WWTP_01_201202	2020-12-02	yes	ultrafiltration		34.8658	36.1147	35.4903	10.2579	34.2295	33.3555	33.7925	4.52286	26.7391	POS	715.343	0.0872217	28.7512	POS		50	721.191	2.85805	295.221	2.47015	POS
WWTP_08	WWTP_08_201118	2020-11-18	no	20mL solids	155.1	35.9108	34.6652	35.288	10.4596	33.4473	34.2416	33.8444	4.99001	no data		no data	no data	28.8739	POS	155.1	100	1475.18	3.16885	634.596	2.8025	POS
WWTP_06	WWTP_06_201113	2020-11-13	no	100mg solidsin100uL	110	35.6978	36.9115	36.3046	10.4736	33.9674	33.2072	33.5873	8.05165	Negative	NEG		-	29.6885	POS	596.9	0.2	1741.5	3.24092	1212.37	3.08363	POS
WWTP_02	WWTP_02_201124	2020-11-24	yes	ultrafiltration		34.8935	34.4546	34.674	10.5758	31.4691	32.1149	31.792	20.1007	25.752	POS	950.322	0.186029	28.8466	POS		50	609.496	2.78497	1222.32	3.08719	POS
WWTP_04	WWTP_04_201120	2020-11-20	no	100mg solidsin100uL	97	35.6248	36.1938	35.9093	10.6579	32.6141	32.4322	32.5231	12.2813	no data		no data	no data	30.0177	POS	323.8	0.2	816.788	2.91211	844.09	2.92639	POS
WWTP_12	WWTP_12_201127	2020-11-27	yes	ultrafiltration		36.1164	35.447	35.7817	10.7068	35.4141	34.4787	34.9464	1.86992	27.8084	POS	416.207	0.0496193	28.5617	POS		50	656.219	2.81705	124.251	2.0943	POS
WWTP_04	WWTP_04_201125	2020-11-25	no	20mL solids	168.9	35.0378	34.3162	34.677	10.7654	33.5002	32.2162	32.8582	10.4226	no data		no data	no data	28.1665	POS	168.9	100	1343.1	3.12811	1470.59	3.16749	POS
WWTP_06	WWTP_06_201111	2020-11-11	yes	ultrafiltration		Negative	36.1328	36.1328	10.833	34.4968	35.3045	34.9007	3.2093	28.4384	POS	284.912	0.0391227	27.2569	POS		50	541.648	2.73372	204.881	2.3115	POS
WWTP_02	WWTP_02_201110	2020-11-10	yes	ultrafiltration		36.2966	35.9496	36.1231	10.9824	33.4034	33.5723	33.4879	8.34984	28.5166	POS	268.61	0.0329048	27.9062	POS		50	613.995	2.78816	442.27	2.64569	POS
WWTP_06	WWTP_06_201125	2020-11-25	no	100mg solidsin100uL	105.3	35.7482	35.781	35.7646	10.9841	32.2736	33.6348	32.9542	12.9433	no data		no data	no data	28.8639	POS	736.7	0.2	1637.15	3.21409	2746.26	3.43874	POS
WWTP_01	WWTP_01_201113	2020-11-13	yes	ultrafiltration		35.6343	34.7639	35.1991	11.085	32.4813	32.6093	32.5453	13.8852	25.9239	POS	1180.3	0.195874	27.3092	POS		50	714.996	2.8543	724.198	2.85986	POS
WWTP_12	WWTP_12_201118	2020-11-18	no	100mg solidsin100uL	96.8	35.7275	Negative	35.7275	11.275	33.907	33.9469	33.9269	5.91831	no data		no data	no data	28.0914	POS	322.8	0.2	727.915	2.86208	387.377	2.58813	POS
WWTP_06	WWTP_06_201127	2020-11-27	yes	ultrafiltration		36.1122	35.3215	35.7168	11.3095	34.4062	33.8279	34.117	3.309	27.3743	POS	565.034	0.0673622	28.5296	POS		50	715.285	2.85448	199.883	2.30078	POS
WWTP_04	WWTP_04_201211	2020-12-11	yes	ultrafiltration		34.9009	35.0331	34.967	11.7129	32.4214	32.5548	32.4881	10.8067	25.8954	POS	1489.43	0.181098	29.0287	POS		50	612.166	2.78687	565.419	2.75237	POS
WWTP_11	WWTP_11_201110	2020-11-10	yes	ultrafiltration		36.0125	Negative	36.0125	11.7623	Negative	35.3909	35.3909	2.18412	28.5313	POS	265.658	0.0325432	29.9746	POS		50	588.113	2.76946	109.206	2.03825	POS
WWTP_04	WWTP_04_201118	2020-11-18	yes	ultrafiltration		35.7175	35.6726	35.695	12.0493	32.5221	31.9591	32.2406	15.1017	26.8819	POS	489.499	0.0923272	26.9517	POS		50	611.292	2.78625	896.854	2.95272	POS
WWTP_02	WWTP_02_201117	2020-11-17	no	20mL solids	183.1	Negative	34.9902	34.9902	12.1989	35.0959	33.5543	34.3251	2.79199	no data		no data	no data	29.2477	POS	183.1	100	1219.89	3.08632	418.723	2.62193	POS
WWTP_01	WWTP_01_201116	2020-11-16	yes	ultrafiltration		34.5531	35.5555	35.0543	12.4159	34.1229	32.2411	33.182	10.9096	27.1716	POS	495.568	0.0822405	27.2822	POS		50	826.236	2.9171	851.576	2.93022	POS
WWTP_06	WWTP_06_201111	2020-11-11	no	100mg solidsin100uL	98.2	35.6844	36.2138	35.9491	12.486	33.4859	33.0817	33.2838	9.72003	Negative	NEG		-	31.3365	POS	530.5	0.2	1562.05	3.1937	1176.99	3.07077	POS
WWTP_04	WWTP_04_201116	2020-11-16	yes	ultrafiltration		36.8825	34.9562	35.9193	12.5298	32.8397	33.8012	33.3204	7.53678	26.8672	POS	494.706	0.0933093	27.7672	POS		50	975.229	2.98911	494.988	2.6946	POS
WWTP_04	WWTP_04_201118	2020-11-18	no	100mg solidsin100uL	94.5	37.096	34.8999	35.998	12.5329	32.8908	33.6162	33.2535	7.71295	no data		no data	no data	29.1761	POS	247.4	0.2	1001.13	3.00049	473.228	2.67507	POS
WWTP_10	WWTP_10_201204	2020-12-04	no	20mL solids	193.7	34.5934	36.0091	35.3013	12.7862	32.8401	32.9455	32.8928	8.88304	28.3291	POS	229.306	-	28.6714	POS	193.7	100	1853.27	3.26794	921.029	2.96427	POS
WWTP_06	WWTP_06_201127	2020-11-27	no	100mg solidsin100uL	97.3	35.4065	35.4175	35.412	13.4437	34.2965	32.2493	33.2729	7.75171	no data		no data	no data	29.0896	POS	608	0.2	1640.95	3.2151	1540	3.18752	POS
WWTP_06	WWTP_06_201202	2020-12-02	no	20mL solids	233.1	35.3152	35.4416	35.3784	13.7706	31.5767	31.7229	31.6498	19.652	no data		no data	no data	27.905	POS	233.1	100	1436.79	3.15739	2070.05	3.31598	POS
WWTP_05	WWTP_05_201110	2020-11-10	no	100mg solidsin100uL	101.7	36.0462	35.5308	35.7885	13.9241	35.2131	32.3231	33.7681	10.6976	Negative	NEG		-	29.0579	POS	341.6	0.2	1117.26	3.04816	1292.63	3.11147	POS
WWTP_04	WWTP_04_201202	2020-12-02	yes	ultrafiltration		34.926	34.5168	34.7214	13.9645	32.4364	32.3603	32.3983	11.9887	27.4106	POS	435.105	0.0866794	28.8767	POS		50	794.589	2.90014	615.273	2.78907	POS
WWTP_04	WWTP_04_201207	2020-12-07	yes	ultrafiltration		34.5435	34.8801	34.7118	14.0323	31.8722	32.402	32.1371	14.0214	26.0002	POS	1389.12	0.168902	Negative	delayed or neg		50	782.249	2.89335	829.032	2.91857	POS
WWTP_12	WWTP_12_201204	2020-12-04	no	20mL solids	86.5	35.0058	34.9549	34.9804	14.2266	32.831	33.8108	33.3209	6.96922	28.4585	POS	209.041	-	27.8391	POS	86.5	100	1447.4	3.16059	926.94	2.96705	POS
WWTP_04	WWTP_04_201125	2020-11-25	yes	ultrafiltration		34.2256	34.2041	34.2149	14.4202	31.5853	31.7029	31.6441	21.7195	26.9352	POS	409.589	0.0778699	28.7867	POS		50	726.423	2.86119	1129.39	3.05285	POS
WWTP_11	WWTP_11_201201	2020-12-01	yes	ultrafiltration		34.8509	Negative	34.8509	14.5731	35.6025	Negative	35.6025	1.16549	25.7462	POS	1455.64	0.174193	32.3895	POS		50	728.655	2.86252	58.2744	1.76548	POS
WWTP_04	WWTP_04_201130	2020-11-30	no	20mL solids	131.6	34.4639	34.7547	34.6093	14.9974	32.4809	32.0309	32.2559	13.3927	no data		no data	no data	27.9837	POS	131.6	100	1647.32	3.21678	1546.88	3.18946	POS
WWTP_01	WWTP_01_201123	2020-11-23	yes	ultrafiltration		35.7626	34.9732	35.3679	15.099	32.7635	32.8818	32.8226	12.7444	28.2499	POS	182.976	0.0195053	29.0203	POS		50	959.941	2.98224	663.38	2.82176	POS
WWTP_01	WWTP_01_201127	2020-11-27	no	20mL solids	82	Negative	35.2157	35.2157	15.3833	33.7101	34.4553	34.0827	3.44245	no data		no data	no data	28.079	POS	82	100	1538.33	3.18705	435.692	2.63918	POS
WWTP_01	WWTP_01_201125	2020-11-25	yes	ultrafiltration		34.8646	35.6502	35.2574	15.4956	33.0578	33.2227	33.1403	6.61797	27.7279	POS	440.496	0.052515	28.2038	POS		50	978.754	2.99067	350.802	2.54506	POS
WWTP_02	WWTP_02_201112	2020-11-12	yes	ultrafiltration		36.112	35.233	35.6725	15.5191	35.5573	33.4889	34.5231	5.13585	27.858	POS	441.123	0.0540378	27.5755	POS		50	1002.49	3.00108	416.451	2.61956	POS
WWTP_04	WWTP_04_201216	2020-12-16	no	20mL solids	159.2	33.9763	34.9944	34.4854	15.716	31.7878	31.4158	31.6018	21.9224	32.9978	POS	87.9364	-	27.8653	POS	159.2	100	2107.83	3.32383	2478.18	3.39413	POS
WWTP_03	WWTP_03_201125	2020-11-25	yes	ultrafiltration		34.6616	36.2101	35.4359	15.9706	32.4388	32.1728	32.3058	18.3049	26.3874	POS	699.486	0.071811	31.2223	POS		50	1196.05	3.07775	999.47	2.99977	POS
WWTP_06	WWTP_06_201125	2020-11-25	yes	ultrafiltration 1:10		33.9381	34.4727	34.2054	16.2094	31.5597	31.2776	31.4186	20.2851	30.9071	POS	24.2783	-	32.5253	POS		500	9643.18	3.98422	11196.9	4.0491	POS
WWTP_04	WWTP_04_201120	2020-11-20	yes	ultrafiltration		34.8941	35.6749	35.2845	16.2586	32.9065	32.5543	32.7304	10.7331	26.7099	POS	554.029	0.104499	26.8986	POS		50	1015.49	3.00668	600.138	2.77825	POS
WWTP_01	WWTP_01_201130	2020-11-30	no	100mg solidsin100uL	108	35.6866	34.5933	35.14	17.358	33.6271	31.7302	32.6786	11.5669	no data		no data	no data	28.0668	POS	325	0.2	1532.84	3.1855	1202.8	3.08019	POS
WWTP_08	WWTP_08_201118	2020-11-18	no	100mg solidsin100uL	102.3	Negative	35.1099	35.1099	17.4342	32.6117	33.914	33.2628	10.3562	no data		no data	no data	28.8874	POS	684.9	0.2	2388.14	3.37806	2019.26	3.30519	POS
WWTP_01	WWTP_01_201130	2020-11-30	yes	ultrafiltration		36.1776	34.3847	35.2812	17.5808	32.4667	33.4257	32.9462	8.08385	26.8616	POS	810.706	0.0966506	28.0303	POS		50	1360.66	3.13375	540.235	2.73258	POS
WWTP_09	WWTP_09_201201	2020-12-01	yes	ultrafiltration		34.3755	34.325	34.3502	17.797	31.9817	30.5727	31.2772	29.2971	26.9011	POS	620.367	0.128618	28.3247	POS		50	905.118	2.95671	2129.37	3.32825	POS
WWTP_06	WWTP_06_201202	2020-12-02	no	100mg solidsin100uL	96.8	34.7128	35.3408	35.0268	17.9213	32.599	33.0529	32.826	8.42549	no data		no data	no data	27.6929	POS	698.5	0.2	3035.04	3.48216	1370.42	3.13685	POS
WWTP_06	WWTP_06_201118	2020-11-18	no	100mg solidsin100uL	93.9	35.9111	34.8578	35.3844	19.2623	35.2794	33.2045	34.242	6.26833	Negative	NEG		-	29.706	POS	604.4	0.2	3132.85	3.49594	1229.87	3.08986	POS
WWTP_02	WWTP_02_201201	2020-12-01	yes	ultrafiltration		34.5459	34.2843	34.4151	19.7672	33.3026	32.5302	32.9164	8.42525	25.8457	POS	1355.55	0.162216	29.9759	POS		50	1077.35	3.03236	535.791	2.729	POS
WWTP_01	WWTP_01_201125	2020-11-25	no	100mg solidsin100uL	100.2	35.7156	34.2074	34.9615	20.8253	32.2398	32.2629	32.2514	12.6461	no data		no data	no data	27.8629	POS	352.2	0.2	2165.05	3.33547	898.309	2.95343	POS
WWTP_06	WWTP_06_201207	2020-12-07	no	20mL solids	90.4	36.949	33.5407	35.2449	20.885	33.5491	34.5925	34.0708	4.15466	28.8145	POS	162.031	-	28.0816	POS	90.4	100	3806.81	3.58056	560.764	2.74878	POS
WWTP_11	WWTP_11_201112	2020-11-12	no	100mg solidsin100uL	110.4	34.753	35.5649	35.1589	21.91	34.5502	32.7257	33.6379	9.09902	Negative	NEG		-	30.6822	POS	625.5	0.2	3483.19	3.54198	1782.85	3.25111	POS
WWTP_04	WWTP_04_201204	2020-12-04	yes	ultrafiltration		34.1338	33.9151	34.0245	22.26	31.1427	31.541	31.3419	25.2021	27.1947	POS	505.694	0.100742	30.4377	POS		50	1195.5	3.07755	1433.31	3.15634	POS
WWTP_04	WWTP_04_201209	2020-12-09	yes	ultrafiltration		34.0812	33.9657	34.0235	22.3683	31.7817	31.6858	31.7337	18.2698	26.3761	POS	1081.75	0.13153	29.1223	POS		50	1162.7	3.06547	943.975	2.97496	POS
WWTP_01	WWTP_01_201116	2020-11-16	no	100mg solidsin100uL	103.7	33.944	34.1897	34.0669	23.1503	31.4679	31.3247	31.3963	30.1419	no data		no data	no data	29.8632	POS	468.3	0.2	2350.6	3.37118	2959.23	3.47118	POS
WWTP_01	WWTP_01_201127	2020-11-27	no	100mg solidsin100uL	104.6	33.8914	34.7337	34.3125	29.7988	31.7416	31.7816	31.7616	18.0868	no data		no data	no data	27.9507	POS	290	0.2	2214.54	3.34528	1064.38	3.0271	POS
WWTP_06	WWTP_06_201125	2020-11-25	no	20mL solids	177	33.8149	33.2455	33.5302	33.3059	31.2527	32.664	31.9584	20.3017	no data		no data	no data	29.4138	POS	177	100	3985.81	3.60052	2960.75	3.4714	POS
WWTP_04	WWTP_04_201202	2020-12-02	no	20mL solids	125.9	32.5896	32.9118	32.7507	53.0184	29.6067	29.8093	29.708	77.8359	no data		no data	no data	28.5574	POS	125.9	100	5879.31	3.76933	8330.31	3.92066	POS
WWTP_06	WWTP_06_201209	2020-12-09	no	20mL solids	83.8	32.9671	32.859	32.913	58.5144	30.5756	30.4146	30.4951	47.6164	28.3503	POS	225.862	-	27.8819	POS	83.8	100	6067.64	3.78302	5029.67	3.70154	POS
WWTP_06	WWTP_06_201209	2020-12-09	yes	ultrafiltration		32.9285	32.2591	32.5938	71.0497	29.4876	29.6577	29.5726	90.8547	29.3243	POS	112.508	0.0137181	28.8928	POS		50	4358.8	3.63937	4821.47	3.68318	POS
WWTP_06	WWTP_06_201216	2020-12-16	yes	ultrafiltration		32.252	32.1153	32.1836	73.785	29.535	29.5467	29.5408	92.9908	33.3092	POS	70.8511	0.0152505	28.572	POS		50	3865.22	3.58717	4668.74	3.6692	POS
WWTP_06	WWTP_06_201202	2020-12-02	yes	ultrafiltration		31.8376	31.9207	31.8791	152.032	28.4584	28.1947	28.3266	223.385	28.5043	POS	254.972	0.0303972	28.5632	POS		50	7818.3	3.89311	12241.7	4.08784	POS
WWTP_06	WWTP_06_201118	2020-11-18	yes	ultrafiltration		32.4228	31.938	32.1804	164.052	30.631	30.2833	30.4572	70.8703	29.5978	POS	118.969	0.0145738	29.4267	POS		50	9550.48	3.98003	3974.94	3.59933	POS
WWTP_09	WWTP_09_201126	2020-11-26	no	100mg solidsin100uL	104.1	Negative	Negative	-		Negative	Negative	-		no data		no data	no data	26.2059	POS	446.8	0.2	0	0	0	0	NEG
WWTP_07	WWTP_07_201118	2020-11-18	yes	ultrafiltration		Negative	Negative	-		Negative	Negative	-		28.4235	POS	161.347	0.027712	26.4841	POS		50	0	0	0	0	NEG
WWTP_08	WWTP_08_201109	2020-11-09	yes	ultrafiltration		Negative	Negative	-		Negative	Negative	-		28.2789	POS	179.049	0.0236109	26.5713	POS		50	0	0	0	0	NEG
WWTP_09	WWTP_09_201115	2020-11-15	yes	ultrafiltration		Negative	Negative	-		35.343	34.4484	34.8957	2.5851	27.8324	POS	246.926	0.0325617	26.6731	POS		50	0	0	167.134	2.22307	POS
WWTP_12	WWTP_12_201111	2020-11-11	yes	ultrafiltration		Negative	Negative	-		36.3849	Negative	36.3849	1.08505	28.4869	POS	274.684	0.0377183	26.8611	POS		50	0	0	0	0	NEG
WWTP_07	WWTP_07_201116	2020-11-16	yes	ultrafiltration		Negative	Negative	-		Negative	Negative	-		27.3405	POS	351.847	0.060431	26.8662	POS		50	0	0	0	0	NEG
WWTP_01	WWTP_01_201211	2020-12-11	no	20mL solids	36.1	Negative	Negative	-		Negative	35.1257	35.1257	1.81035	32.4159	POS	131.676	-	27.1163	POS	36.1	100	0	0	0	0	NEG
WWTP_09	WWTP_09_201112	2020-11-12	yes	ultrafiltration		Negative	Negative	-		34.4261	35.4376	34.9318	2.55396	27.4712	POS	320.258	0.0422319	27.1955	POS		50	0	0	169.67	2.2296	POS
WWTP_05	WWTP_05_201112	2020-11-12	yes	ultrafiltration		Negative	Negative	-		35.3548	34.3015	34.8281	3.47092	27.9534	POS	410.542	0.0502915	27.2396	POS		50	0	0	235.077	2.37121	POS
WWTP_09	WWTP_09_201117	2020-11-17	yes	ultrafiltration		Negative	Negative	-		Negative	Negative	-		29.2566	POS	88.5704	0.0116796	27.2543	POS		50	0	0	0	0	NEG
WWTP_07	WWTP_07_201120	2020-11-20	yes	ultrafiltration		Negative	Negative	-		36.07	33.798	34.934	3.15189	26.9645	POS	461.244	0.0792203	27.317	POS		50	0	0	259.247	2.41371	POS
WWTP_06	WWTP_06_201106	2020-11-06	yes	ultrafiltration		Negative	Negative	-		Negative	Negative	-		28.2957	POS	317.249	0.043563	27.3201	POS		50	0	0	0	0	NEG
WWTP_12	WWTP_12_201113	2020-11-13	yes	ultrafiltration		Negative	Negative	-		34.5599	Negative	34.5599	3.91967	27.8155	POS	455.491	0.0625457	27.3587	POS		50	0	0	195.984	2.29222	POS
WWTP_03	WWTP_03_201202	2020-12-02	no	20mL solids	141.8	Negative	Negative	-		Negative	Negative	-		29.4617	POS	138.834	0.452459	27.394	POS	141.8	100	0	0	0	0	NEG
WWTP_08	WWTP_08_201111	2020-11-11	yes	ultrafiltration		Negative	Negative	-		Negative	Negative	-		27.2655	POS	371.385	0.048974	27.3949	POS		50	0	0	0	0	NEG
WWTP_03	WWTP_03_201111	2020-11-11	yes	ultrafiltration		Negative	Negative	-		Negative	Negative	-		27.7554	POS	330.196	0.0547968	27.4206	POS		50	0	0	0	0	NEG
WWTP_08	WWTP_08_201209	2020-12-09	no	20mL solids	75	Negative	Negative	-		34.3155	35.292	34.8038	2.40782	33.2512	POS	73.7605	-	27.5792	POS	75	100	0	0	320.562	2.50591	POS
WWTP_12	WWTP_12_201209	2020-12-09	no	20mL solids	67	Negative	Negative	-		Negative	34.1295	34.1295	3.65518	32.792	POS	101.433	-	27.5931	POS	67	100	0	0	0	0	NEG
WWTP_08	WWTP_08_201207	2020-12-07	no	20mL solids	169.7	Negative	Negative	-		Negative	Negative	-		33.1835	POS	77.3041	-	27.6327	POS	169.7	100	0	0	0	0	NEG
WWTP_03	WWTP_03_201113	2020-11-13	yes	ultrafiltration		Negative	Negative	-		34.3611	Negative	34.3611	4.07715	26.3368	POS	885.648	0.146975	27.6328	POS		50	0	0	0	0	NEG
WWTP_07	WWTP_07_201204	2020-12-04	yes	ultrafiltration		Negative	Negative	-		35.5525	Negative	35.5525	1.20832	28.2657	POS	239.959	0.0287154	27.6332	POS		50	0	0	0	0	NEG
WWTP_06	WWTP_06_201113	2020-11-13	yes	ultrafiltration		Negative	Negative	-		Negative	Negative	-		33.8871	POS	4.70189	0.000575983	27.6362	POS		50	0	0	0	0	NEG
WWTP_05	WWTP_05_201129	2020-11-29	no	20mL solids	69.8	Negative	Negative	-		Negative	Negative	-		27.8342	POS	326.76	-	27.7405	POS	69.8	100	0	0	0	0	NEG
WWTP_11	WWTP_11_201201	2020-12-01	no	20mL solids	47.5	Negative	Negative	-		Negative	Negative	-		28.6883	POS	177.338	-	27.7715	POS	47.5	100	0	0	0	0	NEG
WWTP_09	WWTP_09_201119	2020-11-19	no	100mg solidsin100uL	109	Negative	Negative	-		Negative	Negative	-		no data		no data	no data	27.7897	POS	1042.8	0.2	0	0	0	0	NEG
WWTP_09	WWTP_09_201119	2020-11-19	yes	ultrafiltration		Negative	Negative	-		Negative	Negative	-		29.543	POS	64.0722	0.0144698	27.8177	POS		50	0	0	0	0	NEG
WWTP_03	WWTP_03_201207	2020-12-07	no	20mL solids	82.4	Negative	Negative	-		Negative	35.2789	35.2789	1.54435	28.5377	POS	256.738	0.836706	27.8319	POS	82.4	100	0	0	0	0	NEG
WWTP_12	WWTP_12_201130	2020-11-30	no	20mL solids	60.5	Negative	Negative	-		35.4314	35.493	35.4622	1.47016	28.7853	POS	165.452	-	27.8334	POS	60.5	100	0	0	150.187	2.17663	POS
WWTP_06	WWTP_06_201116	2020-11-16	yes	ultrafiltration		Negative	Negative	-		Negative	35.4271	35.4271	2.12918	29.7882	POS	103.072	0.0126263	27.8339	POS		50	0	0	106.459	2.02718	POS
WWTP_09	WWTP_09_201206	2020-12-06	no	20mL solids	107.4	Negative	Negative	-		Negative	Negative	-		28.6942	POS	231.351	0.753971	27.8417	POS	107.4	100	0	0	0	0	NEG
WWTP_07	WWTP_07_201130	2020-11-30	no	20mL solids	54.5	Negative	Negative	-		35.0391	Negative	35.0391	1.75061	28.3425	POS	227.13	-	27.8511	POS	54.5	100	0	0	0	0	NEG
WWTP_08	WWTP_08_201211	2020-12-11	yes	ultrafiltration		Negative	Negative	-		35.4731	Negative	35.4731	1.41696	33.808	POS	50.1248	0.0115209	27.8694	POS		50	0	0	0	0	NEG
WWTP_03	WWTP_03_201127	2020-11-27	no	20mL solids	12.7	Negative	Negative	-		34.2284	35.1338	34.6811	2.26184	no data		no data	no data	27.9105	POS	12.7	100	0	0	298.374	2.47476	POS
WWTP_09	WWTP_09_201203	2020-12-03	yes	ultrafiltration		Negative	Negative	-		Negative	Negative	-		30.6971	POS	61.0226	0.00700218	27.9115	POS		50	0	0	0	0	NEG
WWTP_05	WWTP_05_201126	2020-11-26	no	20mL solids	136.4	Negative	Negative	-		32.3016	33.3006	32.8011	5.53645	no data		no data	no data	27.9134	POS	136.4	100	0	0	749.83	2.87496	POS
WWTP_07	WWTP_07_201207	2020-12-07	yes	ultrafiltration		Negative	Negative	-		Negative	Negative	-		28.3112	POS	298.505	0.0452931	27.9146	POS		50	0	0	0	0	NEG
WWTP_11	WWTP_11_201108	2020-11-08	yes	ultrafiltration		Negative	Negative	-		Negative	Negative	-		28.8069	POS	215.854	0.0264423	27.9283	POS		50	0	0	0	0	NEG
WWTP_01	WWTP_01_201214	2020-12-14	yes	ultrafiltration		Negative	Negative	-		Negative	34.4541	34.4541	2.9072	31.5065	POS	247.451	0.053263	27.9392	POS		50	0	0	0	0	NEG
WWTP_08	WWTP_08_201204	2020-12-04	yes	ultrafiltration		Negative	Negative	-		Negative	Negative	-		33.6603	POS	5.05593	0.000693309	27.9431	POS		50	0	0	0	0	NEG
WWTP_09	WWTP_09_201122	2020-11-22	no	20mL solids	186.4	Negative	Negative	-		Negative	Negative	-		no data		no data	no data	27.9957	POS	186.4	100	0	0	0	0	NEG
WWTP_11	WWTP_11_201206	2020-12-06	yes	ultrafiltration		Negative	Negative	-		Negative	Negative	-		28.8918	POS	202.854	0.0307796	28.0177	POS		50	0	0	0	0	NEG
WWTP_07	WWTP_07_201127	2020-11-27	yes	ultrafiltration		Negative	Negative	-		Negative	Negative	-		27.8908	POS	207.545	0.0406276	28.039	POS		50	0	0	0	0	NEG
WWTP_09	WWTP_09_201129	2020-11-29	no	20mL solids	41.1	Negative	Negative	-		Negative	Negative	-		no data		no data	no data	28.0585	POS	41.1	100	0	0	0	0	NEG
WWTP_05	WWTP_05_201108	2020-11-08	yes	ultrafiltration		Negative	Negative	-		Negative	Negative	-		33.625	POS	5.72829	0.000701719	28.0608	POS		50	0	0	0	0	NEG
WWTP_07	WWTP_07_201123	2020-11-23	no	100mg solidsin100uL	101.9	Negative	Negative	-		Negative	34.2276	34.2276	3.74294	no data		no data	no data	28.0709	POS	291.6	0.2	0	0	0	0	NEG
WWTP_07	WWTP_07_201202	2020-12-02	no	20mL solids	24.6	Negative	Negative	-		Negative	Negative	-		28.5897	POS	190.305	-	28.0792	POS	24.6	100	0	0	0	0	NEG
WWTP_09	WWTP_09_201115	2020-11-15	no	100mg solidsin100uL	99.2	Negative	Negative	-		Negative	Negative	-		no data		no data	no data	28.0941	POS	797	0.2	0	0	0	0	NEG
WWTP_10	WWTP_10_201211	2020-12-11	no	20mL solids	63.8	Negative	Negative	-		Negative	Negative	-		32.4432	POS	129.202	-	28.0981	POS	63.8	100	0	0	0	0	NEG
WWTP_08	WWTP_08_201116	2020-11-16	no	20mL solids	162.2	Negative	Negative	-		Negative	Negative	-		no data		no data	no data	28.1038	POS	162.2	100	0	0	0	0	NEG
WWTP_05	WWTP_05_201206	2020-12-06	yes	ultrafiltration		Negative	Negative	-		Negative	Negative	-		29.4788	POS	137.262	0.0208272	28.1147	POS		50	0	0	0	0	NEG
WWTP_07	WWTP_07_201125	2020-11-25	no	20mL solids	45.2	Negative	Negative	-		Negative	Negative	-		no data		no data	no data	28.1178	POS	45.2	100	0	0	0	0	NEG
WWTP_11	WWTP_11_201122	2020-11-22	no	20mL solids	100.5	Negative	Negative	-		33.3713	35.0361	34.2037	2.18945	no data		no data	no data	28.1245	POS	100.5	100	0	0	339.196	2.53045	POS
WWTP_05	WWTP_05_201122	2020-11-22	no	20mL solids	103.7	Negative	Negative	-		34.9017	35.025	34.9634	1.04274	no data		no data	no data	28.1312	POS	103.7	100	0	0	109.036	2.03757	POS
WWTP_09	WWTP_09_201126	2020-11-26	no	20mL solids	114	Negative	Negative	-		Negative	Negative	-		no data		no data	no data	28.1319	POS	114	100	0	0	0	0	NEG
WWTP_10	WWTP_10_201127	2020-11-27	no	20mL solids	122.9	Negative	Negative	-		Negative	Negative	-		no data		no data	no data	28.1756	POS	122.9	100	0	0	0	0	NEG
WWTP_08	WWTP_08_201125	2020-11-25	yes	ultrafiltration		Negative	Negative	-		35.0278	Negative	35.0278	1.92966	28.7941	POS	166.029	0.0344221	28.1915	POS		50	0	0	0	0	NEG
WWTP_03	WWTP_03_201111	2020-11-11	no	100mg solidsin100uL	97.8	Negative	Negative	-		Negative	Negative	-		no data		no data	no data	28.2017	POS	1290.4	0.2	0	0	0	0	NEG
WWTP_10	WWTP_10_201127	2020-11-27	yes	ultrafiltration		Negative	Negative	-		Negative	Negative	-		29.7605	POS	105.272	0.0125504	28.2062	POS		50	0	0	0	0	NEG
WWTP_09	WWTP_09_201201	2020-12-01	no	100mg solidsin100uL	110.8	Negative	Negative	-		35.1359	Negative	35.1359	1.79009	no data		no data	no data	28.2083	POS	462.9	0.2	0	0	165.726	2.21939	POS
WWTP_05	WWTP_05_201122	2020-11-22	no	100mg solidsin100uL	91.5	Negative	Negative	-		35.6896	35.1111	35.4004	1.71827	no data		no data	no data	28.2254	POS	628.8	0.2	0	0	258.073	2.41174	POS
WWTP_02	WWTP_02_201201	2020-12-01	no	20mL solids	71.4	Negative	Negative	-		Negative	35.3017	35.3017	1.44828	28.3821	POS	220.782	-	28.2262	POS	71.4	100	0	0	0	0	NEG
WWTP_08	WWTP_08_201116	2020-11-16	no	100mg solidsin100uL	99.1	Negative	Negative	-		35.6251	33.7693	34.6972	4.21155	no data		no data	no data	28.2273	POS	397.8	0.2	0	0	525.238	2.72036	POS
WWTP_03	WWTP_03_201207	2020-12-07	yes	ultrafiltration		Negative	Negative	-		Negative	Negative	-		27.3761	POS	556.113	0.0638125	28.2312	POS		50	0	0	0	0	NEG
WWTP_11	WWTP_11_201124	2020-11-24	yes	ultrafiltration		Negative	36.9965	36.9965		Negative	34.0117	34.0117	4.33529	26.0623	POS	762.126	0.149189	28.2453	POS		50	102.627	2.01126	216.765	2.33599	POS
WWTP_10	WWTP_10_201123	2020-11-23	yes	ultrafiltration		Negative	Negative	-		Negative	Negative	-		29.7884	POS	103.23	0.0123069	28.2698	POS		50	0	0	0	0	NEG
WWTP_09	WWTP_09_201122	2020-11-22	yes	ultrafiltration		Negative	Negative	-		Negative	Negative	-		28.6527	POS	120.702	0.0272589	28.2917	POS		50	0	0	0	0	NEG
WWTP_08	WWTP_08_201127	2020-11-27	yes	ultrafiltration		Negative	Negative	-		35.3724	Negative	35.3724	1.51902	30.2015	POS	62.3102	0.0129185	28.2968	POS		50	0	0	0	0	NEG
WWTP_07	WWTP_07_201125	2020-11-25	yes	ultrafiltration		Negative	Negative	-		Negative	35.1831	35.1831	1.95407	27.4003	POS	294.201	0.0575909	28.299	POS		50	0	0	0	0	NEG
WWTP_12	WWTP_12_201123	2020-11-23	no	20mL solids	124.5	Negative	Negative	-		Negative	35.3968	35.3968	1.27801	no data		no data	no data	28.3039	POS	124.5	100	0	0	127.087	2.1041	POS
WWTP_08	WWTP_08_201123	2020-11-23	no	100mg solidsin100uL	96.3	Negative	Negative	-		Negative	Negative	-		no data		no data	no data	28.3066	POS	607.8	0.2	0	0	0	0	NEG
WWTP_12	WWTP_12_201123	2020-11-23	yes	ultrafiltration		Negative	Negative	-		35.4863	35.0267	35.2565	1.42782	27.7674	POS	428.417	0.0510749	28.312	POS		50	0	0	83.2641	1.92046	POS
WWTP_03	WWTP_03_201130	2020-11-30	no	20mL solids	68	Negative	Negative	-		Negative	Negative	-		no data		no data	no data	28.3126	POS	68	100	0	0	0	0	NEG
WWTP_09	WWTP_09_201124	2020-11-24	no	20mL solids	181.8	Negative	Negative	-		Negative	35.6266	35.6266	1.44513	no data		no data	no data	28.3221	POS	181.8	100	0	0	0	0	NEG
WWTP_08	WWTP_08_201111	2020-11-11	no	100mg solidsin100uL	95.3	Negative	Negative	-		Negative	Negative	-		no data		no data	no data	28.3244	POS	462.5	0.2	0	0	0	0	NEG
WWTP_10	WWTP_10_201111	2020-11-11	yes	ultrafiltration		Negative	Negative	-		Negative	Negative	-		28.8629	POS	206.943	0.0284164	28.3467	POS		50	0	0	0	0	NEG
WWTP_09	WWTP_09_201124	2020-11-24	yes	ultrafiltration		Negative	Negative	-		Negative	Negative	-		28.3495	POS	149.761	0.0338213	28.3479	POS		50	0	0	0	0	NEG
WWTP_02	WWTP_02_201206	2020-12-06	yes	ultrafiltration		Negative	Negative	-		Negative	Negative	-		30.2062	POS	84.5953	0.0128359	28.3485	POS		50	0	0	0	0	NEG
WWTP_07	WWTP_07_201125	2020-11-25	no	100mg solidsin100uL	91	Negative	Negative	-		Negative	Negative	-		no data		no data	no data	28.3645	POS	224.6	0.2	0	0	0	0	NEG
WWTP_10	WWTP_10_201125	2020-11-25	no	20mL solids	154.9	Negative	Negative	-		Negative	Negative	-		no data		no data	no data	28.376	POS	154.9	100	0	0	0	0	NEG
WWTP_02	WWTP_02_201129	2020-11-29	yes	ultrafiltration		Negative	Negative	-		34.2519	34.9078	34.5799	2.50776	26.4592	POS	873.939	0.104582	28.3957	POS		50	0	0	154.537	2.18903	POS
WWTP_09	WWTP_09_201206	2020-12-06	yes	ultrafiltration		Negative	Negative	-		Negative	Negative	-		29.6428	POS	123.07	0.014122	28.3967	POS		50	0	0	0	0	NEG
WWTP_05	WWTP_05_201124	2020-11-24	no	20mL solids	145.6	Negative	Negative	-		35.2191	35.1535	35.1863	0.883191	no data		no data	no data	28.3995	POS	145.6	100	0	0	90.4664	1.95649	POS
WWTP_03	WWTP_03_201127	2020-11-27	yes	ultrafiltration		Negative	Negative	-		Negative	Negative	-		28.4622	POS	262.653	0.024824	28.4251	POS		50	0	0	0	0	NEG
WWTP_07	WWTP_07_201123	2020-11-23	yes	ultrafiltration		Negative	Negative	-		Negative	Negative	-		26.7752	POS	458.936	0.0898384	28.4376	POS		50	0	0	0	0	NEG
WWTP_11	WWTP_11_201115	2020-11-15	no	100mg solidsin100uL	92.3	Negative	Negative	-		36.3689	34.5569	35.4629	2.0106	no data		no data	no data	28.4452	POS	516	0.2	0	0	320.615	2.50598	POS
WWTP_11	WWTP_11_201124	2020-11-24	no	20mL solids	93.3	Negative	Negative	-		33.9291	Negative	33.9291	4.5858	no data		no data	no data	28.4707	POS	93.3	100	0	0	458.58	2.66142	POS
WWTP_12	WWTP_12_201109	2020-11-09	no	100mg solidsin100uL	112.5	Negative	Negative	-		Negative	Negative	-		no data		no data	no data	28.4824	POS	978.3	0.2	0	0	0	0	NEG
WWTP_03	WWTP_03_201120	2020-11-20	no	20mL solids	40.5	Negative	Negative	-		34.2651	35.2767	34.7709	2.66604	no data		no data	no data	28.5148	POS	40.5	100	0	0	357.461	2.55323	POS
WWTP_03	WWTP_03_201204	2020-12-04	no	20mL solids	76.2	Negative	Negative	-		Negative	Negative	-		28.9714	POS	192.379	0.626962	28.5466	POS	76.2	100	0	0	0	0	NEG
WWTP_03	WWTP_03_201116	2020-11-16	no	100mg solidsin100uL	103.6	Negative	Negative	-		Negative	33.5042	33.5042	7.26675	no data		no data	no data	28.5545	POS	698.3	0.2	0	0	1014.87	3.00641	POS
WWTP_09	WWTP_09_201201	2020-12-01	no	20mL solids	138.7	Negative	Negative	-		Negative	Negative	-		no data		no data	no data	28.5641	POS	138.7	100	0	0	0	0	NEG
WWTP_12	WWTP_12_201116	2020-11-16	no	20mL solids	113	Negative	Negative	-		Negative	Negative	-		no data		no data	no data	28.5885	POS	113	100	0	0	0	0	NEG
WWTP_09	WWTP_09_201119	2020-11-19	no	20mL solids	243.7	Negative	Negative	-		35.5044	Negative	35.5044	1.57031	no data		no data	no data	28.6102	POS	243.7	100	0	0	0	0	NEG
WWTP_05	WWTP_05_201126	2020-11-26	yes	ultrafiltration		Negative	35.9776	35.9776		33.9467	33.7749	33.8608	4.81215	27.1942	POS	340.657	0.0666848	28.6214	POS		50	209.606	2.3214	254.651	2.40594	POS
WWTP_03	WWTP_03_201118	2020-11-18	yes	ultrafiltration		Negative	Negative	-		Negative	Negative	-		29.2474	POS	89.2192	0.00915946	28.6531	POS		50	0	0	0	0	NEG
WWTP_12	WWTP_12_201116	2020-11-16	yes	ultrafiltration		Negative	Negative	-		Negative	Negative	-		29.9461	POS	53.9485	0.00575094	28.6671	POS		50	0	0	0	0	NEG
WWTP_10	WWTP_10_201118	2020-11-18	no	20mL solids	228.5	Negative	Negative	-		34.5247	Negative	34.5247	2.97909	no data		no data	no data	28.6724	POS	228.5	100	0	0	297.909	2.47408	POS
WWTP_08	WWTP_08_201130	2020-11-30	yes	ultrafiltration		Negative	Negative	-		Negative	Negative	-		31.8027	POS	19.1006	0.00261923	28.6778	POS		50	0	0	0	0	NEG
WWTP_02	WWTP_02_201122	2020-11-22	no	20mL solids	135	Negative	Negative	-		36.3554	32.5057	34.4306	3.40808	no data		no data	no data	28.6895	POS	135	100	0	0	644.512	2.80923	POS
WWTP_05	WWTP_05_201115	2020-11-15	no	100mg solidsin100uL	106.6	Negative	37.7435	37.7435		Negative	35.1861	35.1861	2.46993	no data		no data	no data	28.7268	POS	640.6	0.2	348.216	2.54185	316.447	2.5003	POS
WWTP_02	WWTP_02_201126	2020-11-26	no	20mL solids	113.3	Negative	Negative	-		34.2036	32.4837	33.3436	4.19058	no data		no data	no data	28.7431	POS	113.3	100	0	0	655.126	2.81632	POS
WWTP_11	WWTP_11_201119	2020-11-19	no	20mL solids	107.6	Negative	Negative	-		35.4993	35.6688	35.584	1.41898	no data		no data	no data	28.7793	POS	107.6	100	0	0	150.328	2.17704	POS
WWTP_02	WWTP_02_201119	2020-11-19	no	100mg solidsin100uL	94.4	Negative	Negative	-		Negative	33.6211	33.6211	5.84252	no data		no data	no data	28.8004	POS	529.2	0.2	0	0	618.372	2.79125	POS
WWTP_03	WWTP_03_201113	2020-11-13	no	100mg solidsin100uL	107.4	Negative	Negative	-		35.3347	34.4585	34.8966	2.96635	no data		no data	no data	28.807	POS	896.2	0.2	0	0	684.352	2.83528	POS
WWTP_08	WWTP_08_201116	2020-11-16	yes	ultrafiltration		Negative	Negative	-		Negative	Negative	-		28.5906	POS	143.165	0.0146977	28.8206	POS		50	0	0	0	0	NEG
WWTP_04	WWTP_04_201116	2020-11-16	no	20mL solids	62	Negative	Negative	-		33.7757	Negative	33.7757	3.5766	no data		no data	no data	28.8218	POS	62	100	0	0	357.66	2.55347	POS
WWTP_05	WWTP_05_201115	2020-11-15	no	20mL solids	117.1	Negative	Negative	-		Negative	Negative	-		no data		no data	no data	28.8582	POS	117.1	100	0	0	0	0	NEG
WWTP_05	WWTP_05_201129	2020-11-29	yes	ultrafiltration		Negative	Negative	-		35.1185	Negative	35.1185	1.65316	27.3606	POS	458.534	0.0548717	28.9107	POS		50	0	0	0	0	NEG
WWTP_07	WWTP_07_201127	2020-11-27	no	20mL solids	137.2	Negative	Negative	-		Negative	Negative	-		no data		no data	no data	28.9596	POS	137.2	100	0	0	0	0	NEG
WWTP_08	WWTP_08_201207	2020-12-07	yes	ultrafiltration		Negative	Negative	-		Negative	Negative	-		33.2033	POS	76.251	0.0175258	28.9631	POS		50	0	0	0	0	NEG
WWTP_05	WWTP_05_201124	2020-11-24	no	100mg solidsin100uL	100	Negative	Negative	-		34.986	33.2221	34.1041	4.82629	no data		no data	no data	28.9767	POS	567.1	0.2	0	0	841.377	2.92499	POS
WWTP_02	WWTP_02_201124	2020-11-24	no	20mL solids	117.7	Negative	Negative	-		32.514	34.1719	33.343	4.13952	no data		no data	no data	29.0256	POS	117.7	100	0	0	640.568	2.80657	POS
WWTP_08	WWTP_08_201202	2020-12-02	no	20mL solids	245.2	Negative	Negative	-		35.5296	Negative	35.5296	1.40209	28.7657	POS	167.79	-	29.036	POS	245.2	100	0	0	0	0	NEG
WWTP_08	WWTP_08_201120	2020-11-20	yes	ultrafiltration		Negative	Negative	-		Negative	Negative	-		29.3858	POS	80.7577	0.00829078	29.1285	POS		50	0	0	0	0	NEG
WWTP_03	WWTP_03_201120	2020-11-20	yes	ultrafiltration		Negative	Negative	-		Negative	Negative	-		28.5128	POS	151.419	0.0155451	29.1972	POS		50	0	0	0	0	NEG
WWTP_10	WWTP_10_201130	2020-11-30	yes	ultrafiltration		Negative	Negative	-		Negative	35.6543	35.6543	1.12275	27.1679	POS	526.336	0.0641762	29.2038	POS		50	0	0	0	0	NEG
WWTP_03	WWTP_03_201116	2020-11-16	yes	ultrafiltration		Negative	Negative	-		35.5156	Negative	35.5156	1.87178	26.8867	POS	604.183	0.100265	29.3133	POS		50	0	0	93.5892	1.97123	POS
WWTP_06	WWTP_06_201116	2020-11-16	no	100mg solidsin100uL	90.4	Negative	Negative	-		35.499	34.3155	34.9072	3.33973	Negative	NEG		-	29.3477	POS	591.7	0.2	0	0	550.917	2.74109	POS
WWTP_03	WWTP_03_201123	2020-11-23	yes	ultrafiltration		Negative	Negative	-		Negative	Negative	-		26.3355	POS	726.098	0.074543	29.359	POS		50	0	0	0	0	NEG
WWTP_12	WWTP_12_201120	2020-11-20	yes	ultrafiltration		Negative	Negative	-		35.7362	Negative	35.7362	1.68617	29.363	POS	82.097	0.00875157	29.3915	POS		50	0	0	0	0	NEG
WWTP_05	WWTP_05_201115	2020-11-15	yes	ultrafiltration		Negative	Negative	-		35.2271	Negative	35.2271	2.40063	30.6638	POS	32.1787	0.0063459	29.422	POS		50	0	0	120.032	2.0793	POS
WWTP_10	WWTP_10_201118	2020-11-18	no	100mg solidsin100uL	103	Negative	Negative	-		35.3744	34.3318	34.8531	3.31786	no data		no data	no data	29.4811	POS	602.5	0.2	0	0	538.43	2.73113	POS
WWTP_05	WWTP_05_201108	2020-11-08	no	100mg solidsin100uL	107.1	Negative	Negative	-		34.988	36.2227	35.6054	2.05816	Negative	NEG		-	29.5104	POS	384.9	0.2	0	0	223.247	2.34879	POS
WWTP_10	WWTP_10_201123	2020-11-23	no	100mg solidsin100uL	106.5	Negative	Negative	-		Negative	35.3977	35.3977	1.26998	no data		no data	no data	29.5855	POS	600.4	0.2	0	0	0	0	NEG
WWTP_10	WWTP_10_201116	2020-11-16	no	100mg solidsin100uL	105.7	Negative	Negative	-		Negative	Negative	-		no data		no data	no data	29.6409	POS	704.9	0.2	0	0	0	0	NEG
WWTP_11	WWTP_11_201108	2020-11-08	no	100mg solidsin100uL	102.4	Negative	Negative	-		37.7346	35.2461	36.4904	1.41899	Negative	NEG		-	29.6582	POS	499.8	0.2	0	0	241.734	2.38334	POS
WWTP_03	WWTP_03_201123	2020-11-23	no	20mL solids	41.8	Negative	Negative	-		Negative	33.6074	33.6074	5.67133	no data		no data	no data	29.8633	POS	41.8	100	0	0	567.133	2.75368	POS
WWTP_04	WWTP_04_201209	2020-12-09	no	20mL solids 1:5	96.7	Negative	no data	-		33.5056	no data	33.5056	5.31304	30.5784	POS	46.7635	-	29.9566	POS	96.7	500	0	0	2656.52	3.42431	POS
WWTP_08	WWTP_08_201109	2020-11-09	no	100mg solidsin100uL	109.4	Negative	Negative	-		Negative	Negative	-		no data		no data	no data	30.198	POS	473.3	0.2	0	0	0	0	NEG
WWTP_08	WWTP_08_201202	2020-12-02	yes	ultrafiltration		Negative	Negative	-		Negative	Negative	-		32.0991	POS	15.4498	0.0021186	30.2096	POS		50	0	0	0	0	NEG
WWTP_10	WWTP_10_201120	2020-11-20	no	100mg solidsin100uL	97.2	Negative	37.6103	37.6103		Negative	35.4768	35.4768	2.0187	no data		no data	no data	30.2677	POS	761.7	0.2	454.858	2.65788	307.529	2.48789	POS
WWTP_10	WWTP_10_201116	2020-11-16	no	20mL solids	154.9	Negative	Negative	-		Negative	Negative	-		no data		no data	no data	30.2972	POS	154.9	100	0	0	0	0	NEG
WWTP_04	WWTP_04_201123	2020-11-23	no	100mg solidsin100uL 1:10	100	Negative	Negative	-		Negative	35.3962	35.3962	0.755642	Negative	NEG		-	30.3641	POS	528.6	2	0	0	798.865	2.90247	POS
WWTP_12	WWTP_12_201113	2020-11-13	no	100mg solidsin100uL	95.9	Negative	Negative	-		Negative	Negative	-		Negative	NEG		-	30.4706	POS	395.6	0.2	0	0	0	0	NEG
WWTP_10	WWTP_10_201109	2020-11-09	no	100mg solidsin100uL	104.3	Negative	Negative	-		Negative	Negative	-		Negative	NEG		-	30.5341	POS	479.4	0.2	0	0	0	0	NEG
WWTP_10	WWTP_10_201109	2020-11-09	yes	ultrafiltration 1:10		Negative	Negative	-		Negative	35.3158	35.3158	2.08985	30.3212	POS	39.6685	-	31.0131	POS		500	0	0	1044.92	3.01908	POS
WWTP_10	WWTP_10_201204	2020-12-04	yes	ultrafiltration 1:10		Negative	Negative	-		35.6404	Negative	35.6404	1.29751	no data		no data	no data	31.0607	POS		500	0	0	648.755	2.81208	POS
WWTP_10	WWTP_10_201113	2020-11-13	no	100mg solidsin100uL	93.1	Negative	Negative	-		Negative	Negative	-		Negative	NEG		-	31.3872	POS	532.9	0.2	0	0	0	0	NEG
WWTP_10	WWTP_10_201111	2020-11-11	no	100mg solidsin100uL	96.6	Negative	Negative	-		Negative	Negative	-		Negative	NEG		-	31.4201	POS	351.5	0.2	0	0	0	0	NEG
WWTP_05	WWTP_05_201201	2020-12-01	yes	ultrafiltration		Negative	Negative	-		35.4706	Negative	35.4706	1.28195	26.3157	POS	968.473	0.115895	31.5772	POS		50	0	0	0	0	NEG
WWTP_01	WWTP_01_201118	2020-11-18	no	100mg solidsin100uL 1:10	95.3	Negative	Negative	-		Negative	35.2141	35.2141	1.21742	no data		no data	no data	31.7202	POS	281	2	0	0	684.19	2.83518	POS
WWTP_12	WWTP_12_201116	2020-11-16	no	100mg solidsin100uL 1:10	101.7	Negative	Negative	-		34.908	Negative	34.908	1.52679	no data		no data	no data	31.7876	POS	530.8	2	0	0	1620.84	3.20974	POS
WWTP_07	WWTP_07_201127	2020-11-27	no	100mg solidsin100uL 1:10	107.9	Negative	Negative	-		Negative	34.4492	34.4492	1.52517	37.4518	POS	0.139144	1.74188e-05	31.8002	POS	440.1	2	0	0	1342.46	3.1279	POS
WWTP_05	WWTP_05_201117	2020-11-17	no	100mg solidsin100uL 1:10	105.6	Negative	Negative	-		35.1717	Negative	35.1717	1.25621	no data		no data	no data	31.8396	POS	351.8	2	0	0	883.87	2.94639	POS
WWTP_03	WWTP_03_201123	2020-11-23	no	100mg solidsin100uL 1:10	109.3	Negative	Negative	-		Negative	Negative	-		no data		no data	no data	32.047	POS	360.1	2	0	0	0	0	NEG
WWTP_10	WWTP_10_201118	2020-11-18	yes	ultrafiltration 1:10		Negative	Negative	-		Negative	Negative	-		30.7442	POS	27.2622	-	32.2514	POS		500	0	0	0	0	NEG
WWTP_10	WWTP_10_201202	2020-12-02	yes	ultrafiltration		Negative	Negative	-		Negative	34.4943	34.4943	2.5945	26.0254	POS	1192.03	0.145344	32.7927	POS		50	0	0	0	0	NEG
WWTP_03	WWTP_03_201125	2020-11-25	no	100mg solidsin100uL 1:10	105.4	Negative	Negative	-		Negative	35.1537	35.1537	1.273	no data		no data	no data	33.5847	POS	312.2	2	0	0	794.862	2.90029	POS
WWTP_06	WWTP_06_201106	2020-11-06	no	100mg solidsin100uL	103.6	Negative	Negative	-		Negative	Negative	-		Negative	NEG		-	33.8499	POS	463.8	0.2	0	0	0	0	NEG
WWTP_10	WWTP_10_201209	2020-12-09	yes	ultrafiltration		Negative	Negative	-		35.4739	Negative	35.4739	1.41611	31.6458	POS	224.66	0.0483574	Negative	delayed or neg		50	0	0	0	0	NEG
WWTP_10	WWTP_10_201207	2020-12-07	yes	ultrafiltration		Negative	Negative	-		Negative	Negative	-		31.7389	POS	210.606	0.0453323	Negative	delayed or neg		50	0	0	0	0	NEG
WWTP_03	WWTP_03_201120	2020-11-20	no	100mg solidsin100uL	102.2	Negative	Negative	-		Negative	34.5261	34.5261	3.90455	no data		no data	no data	Negative	delayed or neg	244.7	0.2	0	0	191.089	2.28123	POS

## Sheet: PMMoV
Sample_code	MatrixType	Cт	Factor	PelletWeight	Quantity Ext Curve	QuantityPer100mLofWW	QuantLog
WWTP_01_201113	100mg solids eluted in 100µL	21.4301	0.2	660.2	30109.8	3.97569e+06	6.59941
WWTP_01_201116	100mg solids eluted in 100µL	21.7618	0.2	468.3	23960.8	2.24417e+06	6.35106
WWTP_02_201108	100mg solids eluted in 100µL	21.6893	0.2	324	25188	1.63218e+06	6.21277
WWTP_02_201110	100mg solids eluted in 100µL	21.3014	0.2	397.5	32900.2	2.61556e+06	6.41757
WWTP_02_201112	100mg solids eluted in 100µL	22.1326	0.2	412.9	18560.7	1.53274e+06	6.18547
WWTP_02_201115	100mg solids eluted in 100µL	21.7471	0.2	513.8	24205	2.4873e+06	6.39573
WWTP_02_201117	100mg solids eluted in 100µL	21.5707	0.2	516.9	27331.8	2.82556e+06	6.4511
WWTP_02_201119	100mg solids eluted in 100µL	22.0905	0.2	529.2	19106.4	2.02222e+06	6.30583
WWTP_03_201113	100mg solids eluted in 100µL	21.1601	0.2	896.2	36262.9	6.49977e+06	6.8129
WWTP_03_201116	100mg solids eluted in 100µL	21.5139	0.2	698.3	28421	3.96928e+06	6.59871
WWTP_04_201116	100mg solids eluted in 100µL	22.0091	0.2	434	20208.1	1.75406e+06	6.24404
WWTP_04_201118	100mg solids eluted in 100µL	21.8431	0.2	247.4	22655.5	1.12099e+06	6.0496
WWTP_04_201120	100mg solids eluted in 100µL	21.6233	0.2	323.8	26358.3	1.70696e+06	6.23222
WWTP_04_201123	100mg solids eluted in 100µL	22.5065	0.2	528.6	14346.6	1.51672e+06	6.1809
WWTP_04_201125	100mg solids eluted in 100µL	21.3144	0.2	396.6	32606.5	2.58634e+06	6.41269
WWTP_05_201108	100mg solids eluted in 100µL	21.2784	0.2	384.9	33426.7	2.57319e+06	6.41047
WWTP_05_201110	100mg solids eluted in 100µL	21.7544	0.2	341.6	24083.7	1.6454e+06	6.21627
WWTP_05_201112	100mg solids eluted in 100µL	22.6426	0.2	592.4	13063.3	1.54774e+06	6.1897
WWTP_06_201109	100mg solids eluted in 100µL	22.172	0.2	446.1	18064.1	1.61168e+06	6.20728
WWTP_06_201111	100mg solids eluted in 100µL	22.7762	0.2	530.5	11915.2	1.2642e+06	6.10182
WWTP_06_201113	100mg solids eluted in 100µL	21.9034	0.2	596.9	21733.6	2.59455e+06	6.41406
WWTP_06_201116	100mg solids eluted in 100µL	21.7551	0.2	591.7	24070.9	2.84856e+06	6.45462
WWTP_06_201118	100mg solids eluted in 100µL	23.3963	0.2	604.4	7773.39	939647	5.97296
WWTP_07_201116	100mg solids eluted in 100µL	22.7007	0.2	421.7	12551	1.05855e+06	6.02471
WWTP_07_201120	100mg solids eluted in 100µL	22.8332	0.2	401.1	11455.9	918994	5.96331
WWTP_09_201117	100mg solids eluted in 100µL	23.5366	0.2	530.5	7057.26	748775	5.87435
WWTP_11_201108	100mg solids eluted in 100µL	22.4424	0.2	499.8	14994.4	1.49884e+06	6.17576
WWTP_11_201110	100mg solids eluted in 100µL	22.385	0.2	538.3	15599.4	1.67943e+06	6.22516
WWTP_11_201112	100mg solids eluted in 100µL	21.9434	0.2	625.5	21143.1	2.64501e+06	6.42243
WWTP_11_201115	100mg solids eluted in 100µL	22.453	0.2	516	14885.5	1.53619e+06	6.18644
WWTP_11_201117	100mg solids eluted in 100µL	21.8961	0.2	563.8	21842.9	2.46301e+06	6.39147
WWTP_11_201122	100mg solids eluted in 100µL	21.8737	0.2	477.3	22183.6	2.11764e+06	6.32585
WWTP_11_201124	100mg solids eluted in 100µL	21.7766	0.2	382.9	23717.2	1.81626e+06	6.25918
WWTP_11_201126	100mg solids eluted in 100µL	22.3966	0.2	490.5	15474.6	1.51806e+06	6.18129
WWTP_12_201118	100mg solids eluted in 100µL	22.0513	0.2	322.8	19628.8	1.26723e+06	6.10286
WWTP_01_201113	Ultrafiltration	18.5811	50		214210	1.07105e+07	7.02981
WWTP_01_201116	Ultrafiltration	19.4549	50		117352	5.86761e+06	6.76846
WWTP_01_201118	Ultrafiltration	19.8822	50		87435.4	4.37177e+06	6.64066
WWTP_01_201120	Ultrafiltration	20.5282	50		56034.2	2.80171e+06	6.44742
WWTP_01_201123	Ultrafiltration	19.2088	50		139024	6.95119e+06	6.84206
WWTP_01_201125	Ultrafiltration	19.74	50		96431.1	4.82155e+06	6.68319
WWTP_01_201127	Ultrafiltration	18.9092	50		170882	8.5441e+06	6.93167
WWTP_01_201130	Ultrafiltration	18.5132	50		224465	1.12233e+07	7.05012
WWTP_01_201202	Ultrafiltration	20.0772	50		76449.4	3.82247e+06	6.58234
WWTP_01_201204	Ultrafiltration	19.4298	50		119398	5.96988e+06	6.77597
WWTP_01_201207	Ultrafiltration	18.577	50		214811	1.07406e+07	7.03103
WWTP_02_201020	Ultrafiltration	18.8185	50		181907	9.09535e+06	6.95882
WWTP_02_201022	Ultrafiltration	17.9165	50		338565	1.69283e+07	7.22861
WWTP_02_201027	Ultrafiltration	18.4159	50		240017	1.20009e+07	7.07921
WWTP_02_201029	Ultrafiltration	18.2557	50		268028	1.34014e+07	7.12715
WWTP_02_201110	Ultrafiltration	18.9165	50		170031	8.50154e+06	6.9295
WWTP_02_201112	Ultrafiltration	18.2062	50		277311	1.38656e+07	7.14194
WWTP_02_201115	Ultrafiltration	18.1837	50		281656	1.40828e+07	7.14869
WWTP_02_201117	Ultrafiltration	18.4548	50		233674	1.16837e+07	7.06758
WWTP_02_201119	Ultrafiltration	18.462	50		232528	1.16264e+07	7.06545
WWTP_02_201122	Ultrafiltration	18.6878	50		199040	9.952e+06	6.99791
WWTP_02_201124	Ultrafiltration	18.3534	50		250580	1.2529e+07	7.09792
WWTP_02_201126	Ultrafiltration	18.7069	50		196438	9.82192e+06	6.9922
WWTP_02_201201	Ultrafiltration	18.8861	50		173632	8.68162e+06	6.9386
WWTP_02_201203	Ultrafiltration	18.1135	50		295607	1.47804e+07	7.16969
WWTP_02_201208	Ultrafiltration	19.2598	50		134231	6.71157e+06	6.82682
WWTP_02_201210	Ultrafiltration	18.0071	50		318076	1.59038e+07	7.2015
WWTP_03_201116	Ultrafiltration	18.6339	50		206567	1.03283e+07	7.01403
WWTP_03_201125	Ultrafiltration	19.3871	50		122963	6.14816e+06	6.78875
WWTP_03_201130	Ultrafiltration	21.2099	50		35039.6	1.75198e+06	6.24353
WWTP_03_201204	Ultrafiltration	19.1401	50		145767	7.28836e+06	6.86263
WWTP_04_201026	Ultrafiltration	17.413	50		478874	2.39437e+07	7.37919
WWTP_04_201028	Ultrafiltration	17.906	50		341019	1.70509e+07	7.23175
WWTP_04_201030	Ultrafiltration	18.834	50		179974	8.99868e+06	6.95418
WWTP_04_201102	Ultrafiltration	18.4879	50		228408	1.14204e+07	7.05768
WWTP_04_201104	Ultrafiltration	17.9521	50		330351	1.65175e+07	7.21795
WWTP_04_201106	Ultrafiltration	18.1015	50		298044	1.49022e+07	7.17325
WWTP_04_201116	Ultrafiltration	18.1556	50		287143	1.43572e+07	7.15707
WWTP_04_201118	Ultrafiltration	18.402	50		242336	1.21168e+07	7.08339
WWTP_04_201120	Ultrafiltration	18.3898	50		244375	1.22188e+07	7.08703
WWTP_04_201123	Ultrafiltration	18.2867	50		262370	1.31185e+07	7.11788
WWTP_04_201125	Ultrafiltration	18.1823	50		281929	1.40965e+07	7.14911
WWTP_04_201127	Ultrafiltration	18.0925	50		299909	1.49955e+07	7.17596
WWTP_04_201130	Ultrafiltration	17.9983	50		320011	1.60005e+07	7.20413
WWTP_04_201202	Ultrafiltration	18.757	50		189770	9.48851e+06	6.9772
WWTP_04_201204	Ultrafiltration	18.3941	50		243649	1.21824e+07	7.08573
WWTP_04_201207	Ultrafiltration	20.9114	50		43038.7	2.15194e+06	6.33283
WWTP_04_201209	Ultrafiltration	17.7352	50		383584	1.91792e+07	7.28283
WWTP_04_201211	Ultrafiltration	17.7816	50		371524	1.85762e+07	7.26896
WWTP_04_201214	Ultrafiltration	18.1309	50		292076	1.46038e+07	7.16447
WWTP_04_201216	Ultrafiltration	20.2375	50		68458.3	3.42291e+06	6.5344
WWTP_05_201022	Ultrafiltration	19.2034	50		139545	6.97726e+06	6.84368
WWTP_05_201027	Ultrafiltration	18.7712	50		187932	9.39658e+06	6.97297
WWTP_05_201110	Ultrafiltration	19.7838	50		93567.3	4.67836e+06	6.67009
WWTP_05_201112	Ultrafiltration	19.2688	50		133400	6.66998e+06	6.82412
WWTP_05_201115	Ultrafiltration	19.7374	50		96605.2	4.83026e+06	6.68397
WWTP_05_201117	Ultrafiltration	19.0385	50		156326	7.81632e+06	6.893
WWTP_05_201119	Ultrafiltration	19.8966	50		86572.4	4.32862e+06	6.63635
WWTP_05_201122	Ultrafiltration	18.5793	50		214480	1.0724e+07	7.03036
WWTP_05_201124	Ultrafiltration	18.9296	50		168504	8.42518e+06	6.92558
WWTP_05_201203	Ultrafiltration	19.2627	50		133964	6.69822e+06	6.82596
WWTP_05_201208	Ultrafiltration	18.397	50		243164	1.21582e+07	7.08487
WWTP_05_201210	Ultrafiltration	19.3923	50		122525	6.12623e+06	6.78719
WWTP_06_201028	Ultrafiltration	18.3863	50		244975	1.22488e+07	7.08809
WWTP_06_201102	Ultrafiltration	18.7098	50		196044	9.80219e+06	6.99132
WWTP_06_201104	Ultrafiltration	19.14	50		145774	7.28872e+06	6.86265
WWTP_06_201109	Ultrafiltration	18.8616	50		176586	8.82928e+06	6.94593
WWTP_06_201111	Ultrafiltration	18.7744	50		187507	9.37536e+06	6.97199
WWTP_06_201116	Ultrafiltration	19.5518	50		109773	5.48864e+06	6.73946
WWTP_06_201118	Ultrafiltration	19.3339	50		127547	6.37733e+06	6.80464
WWTP_06_201120	Ultrafiltration	18.896	50		172454	8.62269e+06	6.93564
WWTP_06_201123	Ultrafiltration	19.5232	50		111957	5.59784e+06	6.74802
WWTP_06_201125	Ultrafiltration	18.7111	50		195866	9.79332e+06	6.99093
WWTP_06_201127	Ultrafiltration	19.2873	50		131711	6.58555e+06	6.81859
WWTP_06_201130	Ultrafiltration	18.4956	50		227211	1.13606e+07	7.0554
WWTP_06_201202	Ultrafiltration	18.6036	50		210913	1.05456e+07	7.02307
WWTP_06_201204	Ultrafiltration	19.2879	50		131654	6.58272e+06	6.81841
WWTP_06_201207	Ultrafiltration	18.5769	50		214827	1.07414e+07	7.03106
WWTP_06_201209	Ultrafiltration	18.7205	50		194601	9.73006e+06	6.98812
WWTP_06_201211	Ultrafiltration	17.8378	50		357420	1.7871e+07	7.25215
WWTP_06_201214	Ultrafiltration	18.658	50		203157	1.01579e+07	7.0068
WWTP_06_201216	Ultrafiltration	18.4934	50		227554	1.13777e+07	7.05605
WWTP_07_201026	Ultrafiltration	18.7021	50		197088	9.8544e+06	6.99363
WWTP_07_201120	Ultrafiltration	18.2406	50		270823	1.35411e+07	7.13165
WWTP_07_201202	Ultrafiltration	18.3814	50		245797	1.22899e+07	7.08955
WWTP_08_201118	Ultrafiltration	18.1203	50		294212	1.47106e+07	7.16763
WWTP_08_201123	Ultrafiltration	19.1826	50		141562	7.07808e+06	6.84992
WWTP_08_201209	Ultrafiltration	22.3082	50		16446.1	822306	5.91503
WWTP_09_201022	Ultrafiltration	19.3325	50		127671	6.38354e+06	6.80506
WWTP_09_201027	Ultrafiltration	18.955	50		165585	8.27924e+06	6.91799
WWTP_09_201101	Ultrafiltration	18.3173	50		256891	1.28445e+07	7.10872
WWTP_09_201112	Ultrafiltration	18.8327	50		180137	9.00684e+06	6.95457
WWTP_09_201115	Ultrafiltration	18.7473	50		191045	9.55226e+06	6.98011
WWTP_09_201126	Ultrafiltration	17.7963	50		367775	1.83887e+07	7.26455
WWTP_09_201201	Ultrafiltration	18.612	50		209704	1.04852e+07	7.02058
WWTP_09_201208	Ultrafiltration	22.3082	50		16446.1	822306	5.91503
WWTP_10_201109	Ultrafiltration	18.5438	50		219792	1.09896e+07	7.04098
WWTP_10_201113	Ultrafiltration	19.3605	50		125236	6.26181e+06	6.7967
WWTP_10_201116	Ultrafiltration	19.7181	50		97896.6	4.89483e+06	6.68974
WWTP_10_201120	Ultrafiltration	19.1351	50		146269	7.31345e+06	6.86412
WWTP_10_201125	Ultrafiltration	18.4522	50		234096	1.17048e+07	7.06836
WWTP_10_201204	Ultrafiltration	18.5519	50		218569	1.09284e+07	7.03856
WWTP_10_201211	Ultrafiltration	19.0755	50		152393	7.61965e+06	6.88193
WWTP_11_201020	Ultrafiltration	19.1794	50		141871	7.09355e+06	6.85086
WWTP_11_201025	Ultrafiltration	18.9452	50		166706	8.33531e+06	6.92092
WWTP_11_201027	Ultrafiltration	18.7149	50		195354	9.7677e+06	6.98979
WWTP_11_201029	Ultrafiltration	19.6093	50		105515	5.27575e+06	6.72228
WWTP_11_201110	Ultrafiltration	19.5105	50		112943	5.64715e+06	6.75183
WWTP_11_201112	Ultrafiltration	19.2452	50		135585	6.77926e+06	6.83118
WWTP_11_201115	Ultrafiltration	18.844	50		178739	8.93694e+06	6.95119
WWTP_11_201117	Ultrafiltration	24.5917	50		3412.41	170620	5.23203
WWTP_11_201122	Ultrafiltration	19.0183	50		158522	7.92612e+06	6.89906
WWTP_11_201124	Ultrafiltration	25.8259	50		1458.54	72926.8	4.86289
WWTP_11_201126	Ultrafiltration	17.6796	50		398547	1.99274e+07	7.29945
WWTP_11_201129	Ultrafiltration	21.4103	50		30522.7	1.52614e+06	6.18359
WWTP_11_201201	Ultrafiltration	19.1241	50		147377	7.36885e+06	6.8674
WWTP_11_201203	Ultrafiltration	22.2447	50		17182	859100	5.93404
WWTP_11_201208	Ultrafiltration	18.8411	50		179092	8.95459e+06	6.95205
WWTP_11_201210	Ultrafiltration	19.5666	50		108660	5.43298e+06	6.73504
WWTP_12_201021	Ultrafiltration	19.214	50		138532	6.92659e+06	6.84052
WWTP_12_201030	Ultrafiltration	19.2266	50		137334	6.86672e+06	6.83675
WWTP_12_201113	Ultrafiltration	19.1461	50		145158	7.25788e+06	6.86081
WWTP_12_201118	Ultrafiltration	19.6597	50		101914	5.09568e+06	6.7072
WWTP_12_201123	Ultrafiltration	18.6416	50		205472	1.02736e+07	7.01172
WWTP_12_201125	Ultrafiltration	19.7715	50		94363.8	4.71819e+06	6.67378
WWTP_12_201127	Ultrafiltration	18.3749	50		246896	1.23448e+07	7.09148
WWTP_12_201130	Ultrafiltration	22.5371	50		14047.2	702359	5.84656
WWTP_12_201202	Ultrafiltration	20.7803	50		47103.1	2.35516e+06	6.37202
WWTP_12_201204	Ultrafiltration	17.6862	50		396732	1.98366e+07	7.29747
WWTP_12_201207	Ultrafiltration	19.241	50		135982	6.79909e+06	6.83245
WWTP_12_201209	Ultrafiltration	18.9098	50		170817	8.54084e+06	6.9315
WWTP_12_201211	Ultrafiltration	19.472	50		115977	5.79883e+06	6.76334
WWTP_01_201118	solids from 20mL eluted in 100µL	24.3599	100		4003.13	400313	5.6024
WWTP_01_201120	solids from 20mL eluted in 100µL	24.7261	100		3110.74	311074	5.49286
WWTP_01_201123	solids from 20mL eluted in 100µL	23.1453	100		9240.32	924032	5.96569
WWTP_02_201115	solids from 20mL eluted in 100µL	22.9524	100		10553.5	1.05535e+06	6.0234
WWTP_02_201117	solids from 20mL eluted in 100µL	23.2934	100		8344.41	834441	5.9214
WWTP_02_201119	solids from 20mL eluted in 100µL	22.8257	100		11515.7	1.15157e+06	6.06129
WWTP_02_201122	solids from 20mL eluted in 100µL	22.5498	100		13925.1	1.39251e+06	6.1438
WWTP_02_201124	solids from 20mL eluted in 100µL	23.1102	100		9466.46	946646	5.97619
WWTP_02_201126	solids from 20mL eluted in 100µL	22.7106	100		12465.5	1.24655e+06	6.09571
WWTP_03_201125	solids from 20mL eluted in 100µL	21.7557	100		24060.7	2.40607e+06	6.38131
WWTP_04_201116	solids from 20mL eluted in 100µL	24.9637	100		2641.2	264120	5.4218
WWTP_04_201118	solids from 20mL eluted in 100µL	24.2838	100		4218.55	421855	5.62516
WWTP_04_201120	solids from 20mL eluted in 100µL	23.484	100		7317.99	731799	5.86439
WWTP_04_201123	solids from 20mL eluted in 100µL	24.5172	100		3592.12	359212	5.55535
WWTP_04_201125	solids from 20mL eluted in 100µL	23.6252	100		6639.82	663982	5.82216
WWTP_04_201130	solids from 20mL eluted in 100µL	23.0197	100		10075.1	1.00751e+06	6.00325
WWTP_04_201202	solids from 20mL eluted in 100µL	23.2846	100		8394.84	839484	5.92401
WWTP_04_201204	solids from 20mL eluted in 100µL	23.6596	100		6484.37	648437	5.81187
WWTP_05_201117	solids from 20mL eluted in 100µL	23.7107	100		6260.21	626021	5.79659
WWTP_05_201119	solids from 20mL eluted in 100µL	24.0611	100		4917.89	491789	5.69178
WWTP_05_201122	solids from 20mL eluted in 100µL	22.3476	100		16005.5	1.60055e+06	6.20427
WWTP_05_201124	solids from 20mL eluted in 100µL	23.9363	100		5359.09	535909	5.72909
WWTP_05_201126	solids from 20mL eluted in 100µL	22.8215	100		11548.9	1.15489e+06	6.06254
WWTP_06_201120	solids from 20mL eluted in 100µL	25.0367	100		2511.77	251177	5.39998
WWTP_06_201123	solids from 20mL eluted in 100µL	24.4565	100		3745.54	374554	5.57351
WWTP_06_201125	solids from 20mL eluted in 100µL	23.5657	100		6917.52	691752	5.83995
WWTP_07_201116	solids from 20mL eluted in 100µL	23.1303	100		9336.25	933625	5.97017
WWTP_07_201120	solids from 20mL eluted in 100µL	23.7204	100		6218.36	621836	5.79368
WWTP_08_201118	solids from 20mL eluted in 100µL	23.2922	100		8351.46	835146	5.92176
WWTP_11_201115	solids from 20mL eluted in 100µL	23.1877	100		8974.55	897455	5.95301
WWTP_11_201117	solids from 20mL eluted in 100µL	14.9161	100		2.67334e+06	2.67334e+08	8.42705
WWTP_11_201122	solids from 20mL eluted in 100µL	22.5797	100		13641.1	1.36411e+06	6.13485
WWTP_11_201124	solids from 20mL eluted in 100µL	23.5141	100		7167.91	716791	5.85539
WWTP_11_201126	solids from 20mL eluted in 100µL	22.7531	100		12105.8	1.21058e+06	6.083
WWTP_12_201118	solids from 20mL eluted in 100µL	24.8453	100		2865.64	286564	5.45722
