# Supplementary material
Source: MDPI journal article supplement (https://www.mdpi.com/2073-4441/13/16/2166)
Supplement: s1 [file s1 › TableS1_revised20210731.pdf]

**Table S1. Primers used in this study**

| Target      | Primer/Probe         | Sequence (5'→3')                               | Reference |
|-------------|----------------------|------------------------------------------------|-----------|
| N2 gene     | 2019-nCoV_N2-Forward | TTA CAA ACA TTG GCC GCA AA                     | [29]      |
|             | 2019-nCoV_N2-Reverse | GCG CGA CAT TCC GAA GAA                        | [29]      |
|             | 2019-nCoV_N2-Probe   | <i>FAM-ACA ATT TGC CCC CAG CGC TTC AG-BHQ1</i> | [29]      |
| E gene      | COVID19_E_For_V2     | GAG ACA GGT ACG TTA ATA GTT AAT AGC G          | [28]      |
|             | COVID19_E_Rev_V2     | CAA TAT TGC AGC AGT ACG CAC AC                 | [28]      |
|             | COVID19_E-Probe      | <i>NED-CTA GCC ATC CTT ACT GCG-MGB-NFQ</i>     | [28]      |
| 229E M gene | 229E-Forward         | TTC CGA CGT GCT CGA ACT TT                     | [30]      |
|             | 229E-Reverse         | CCA ACA CGG TTG TGA CAG TGA                    | [30]      |
|             | 229E-Probe           | <i>FAM-TCC TGA GGT CAA TGC A-MGB-NFQ</i>       | [30]      |
| PMMoV       | PMMoV-Forward        | GAG TGG TTT GAC CTT AAC GTT GA                 | [32]      |
|             | PMMoV-Reverse        | TTG TCG GTT GCA ATG CAA GT                     | [32]      |
|             | PMMoV-Probe          | <i>FAM-CCT ACC GAA GCA AAT G-BHQ1</i>          | [32]      |
| Salmon DNA  | sDNA-Forward         | GGT TTC CGC AGC TGG G                          | [31]      |
|             | sDNA-Reverse         | CCG AGC CGT CCT GGT C                          | [31]      |
|             | sDNA-Probe           | <i>VIC-AGT CGC AGG CGG CCA CCG T-TAMRA</i>     | [31]      |
